# Supplementary material
Source: PubMed Central journal article supplement (PMC7127016)
Supplement: mmc2.pdf [file mmc2.pdf]

# Structure

## The RNA-Binding Site of Poliovirus 3C Protein Doubles as a Phosphoinositide-Binding Domain

### Graphical Abstract

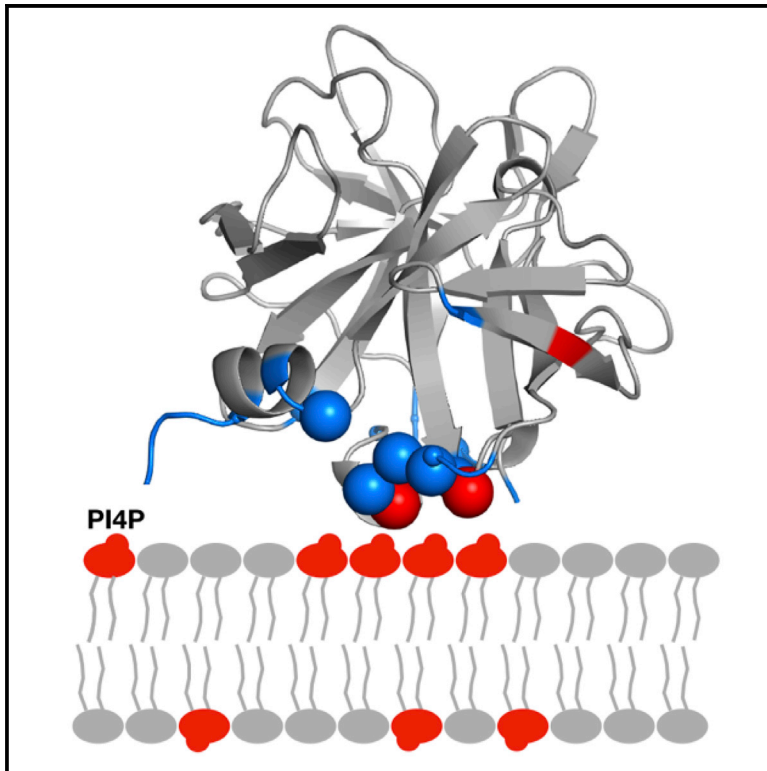

### Authors

Djoshkun Shengjuler, Yan Mei Chan, Simou Sun, ..., Paul S. Cremer, David D. Boehr, Craig E. Cameron

### Correspondence

cec9@psu.edu

### In Brief

The absence of conventional PIP-binding domains in viral proteins suggests unique structural solutions to this problem. Shengjuler et al. show that a viral RNA-binding site can be repurposed for PIP binding. PIP clustering can be achieved. The nature of the PIP may regulate protein conformation.

### Highlights

- A viral PIP-binding site identified, validated, and characterized
- PIP-binding site overlaps the known RNA-binding site
- PIP-binding site clusters PIPs and perhaps regulates conformation and function
- Duality of PIP- and RNA-binding sites may extend to other viruses

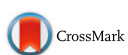

# The RNA-Binding Site of Poliovirus 3C Protein Doubles as a Phosphoinositide-Binding Domain

Djoshkun Shengjuler,<sup>1</sup> Yan Mei Chan,<sup>2</sup> Simou Sun,<sup>2</sup> Ibrahim M. Moustafa,<sup>1</sup> Zhen-Lu Li,<sup>3</sup> David W. Gohara,<sup>4</sup> Matthias Buck,<sup>3</sup> Paul S. Cremer,<sup>1,2</sup> David D. Boehr,<sup>2</sup> and Craig E. Cameron<sup>1,5,\*</sup>

<sup>1</sup>Department of Biochemistry and Molecular Biology

<sup>2</sup>Department of Chemistry

The Pennsylvania State University, University Park, PA 16802, USA

<sup>3</sup>Department of Physiology and Biophysics, Case Western Reserve University, School of Medicine, Cleveland, OH 44106, USA

<sup>4</sup>Department of Biochemistry and Molecular Biology, St. Louis University School of Medicine, St. Louis, MO 63104, USA

<sup>5</sup>Lead Contact

\*Correspondence: [cec9@psu.edu](mailto:cec9@psu.edu)

<https://doi.org/10.1016/j.str.2017.11.001>

## SUMMARY

Some viruses use phosphatidylinositol phosphate (PIP) to mark membranes used for genome replication or virion assembly. PIP-binding motifs of cellular proteins do not exist in viral proteins. Molecular-docking simulations revealed a putative site of PIP binding to poliovirus (PV) 3C protein that was validated using nuclear magnetic resonance spectroscopy. The PIP-binding site was located on a highly dynamic  $\alpha$  helix, which also functions in RNA binding. Broad PIP-binding activity was observed in solution using a fluorescence polarization assay or in the context of a lipid bilayer using an on-chip, fluorescence assay. All-atom molecular dynamics simulations of the 3C protein-membrane interface revealed PIP clustering and perhaps PIP-dependent conformations. PIP clustering was mediated by interaction with residues that interact with the RNA phosphodiester backbone. We conclude that 3C binding to membranes will be determined by PIP abundance. We suggest that the duality of function observed for 3C may extend to RNA-binding proteins of other viruses.

## INTRODUCTION

Positive-strand RNA viruses of eukaryotes often replicate their genomes in association with membranes (Belov and van Kuppeveld, 2012). The reason for this circumstance is not known. However, some suggest that assembly on membranes facilitates co-localization of components of viral machinery required for genome replication and virus assembly. This scenario might also conceal viral replication intermediates, for example, double-stranded RNA and progeny genomes, which are often uncapped, from interactions with cellular pattern recognition receptors and other antiviral mechanisms that would induce interferon and limit virus spread (Miller and Krijnse-Locker, 2008; Romero-Brey and Bartenschlager, 2014).

Sites of viral genome replication are created by commandeering cellular membranes. Replication compartments can be created by using organellar membranes, by hijacking vesicles of the secretory and/or endocytic pathways, or even by inducing unique membranous structures using a blend of the first two mechanisms (Belov and van Kuppeveld, 2012; Romero-Brey and Bartenschlager, 2014; Xu and Nagy, 2014). Regardless of the origin of the membranes used for genome replication, these sites are often remodeled to produce an environment competent for maximal function. This virus-induced environment includes changes to lipid and protein composition relative to membranes found in uninfected cells.

How viral proteins are targeted specifically to sites of genome replication is a longstanding question in virology. Before 2010, conventional wisdom was that an interaction between a viral protein and a cellular protein associated with viral-induced membranes accomplished this task. Interactions between viral proteins would then recruit the full complement of the genome-replication machinery. In 2010, Altan-Bonnet and colleagues discovered that a picornavirus induced the synthesis of the phosphoinositide, phosphatidylinositol 4-phosphate (PI4P), and showed that PI4P tracked with sites of genome replication (Hsu et al., 2010). This observation inspired the hypothesis that a cellular lipid rather than a cellular protein might be the lure used to recruit viral proteins (Hsu et al., 2010).

Phosphatidylinositol phosphate phospholipids (PIPs) function as a zip code during protein sorting to the appropriate subcellular compartment. Proteins destined for a specific cellular membrane will encode a PIP-binding determinant specific for one or a few PIPs. The most extensively characterized PIP-binding determinant is from phospholipase C (PLC), the so-called pleckstrin homology (PH) domain. This PH domain interacts with phosphatidylinositol 4,5-bisphosphate (PI(4,5)P<sub>2</sub>) specifically (Harlan et al., 1994). In addition to sorting, PH and related domains can be used to maintain an enzymatic activity in a latent state until the PH domain is engaged by the appropriate PIP, thus restricting enzyme activation to the appropriate subcellular compartment (Balla, 2013; van Meer et al., 2008). All of these features are well suited to the needs of a virus to target its proteins and enzymes to the appropriate site and restrict their functions to those sites.

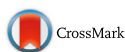

Do viral proteins contain PIP-binding determinants or are they targeted by association with a cellular protein containing a PIP-binding domain? Vaccinia virus, a DNA virus, is known to encode a PIP-binding protein (H7); the discovery of this protein was suggested by structural homology to the phox homology (PX) domain (Kolli et al., 2015). The retroviral matrix protein (MA) binds to PI(4,5)P<sub>2</sub>, which acts as a switch, promoting interaction with membrane and virus assembly (Chukkapalli et al., 2010; Saad et al., 2006). Ebola virus virion protein, VP40, also links PI(4,5)P<sub>2</sub> binding to virus assembly (Johnson et al., 2016). For picornaviruses, it has been suggested that the viral polymerase binds directly to PI4P because it is retained on a PI4P-spotted hydrophobic membrane (Hsu et al., 2010). Despite a structure for the poliovirus (PV) polymerase and many other RNA virus-encoded proteins, structural homology to a known cellular PIP-binding protein has not been reported.

The picornaviral 3CD protein is a polyprotein cleavage product that accumulates in infected cells. This protein fuses the 3C protease domain and 3D polymerase domain. Although 3CD lacks polymerase activity, this protein contributes to many functions essential to virus multiplication (Cameron et al., 2010). 3CD interacts with membranes, induces recruitment of cellular proteins to membranes, binds to the viral genome, and somehow even stimulates virus assembly (Belov et al., 2007; Franco et al., 2005; Parsley et al., 1997; Pathak et al., 2007).

We used a molecular-docking algorithm to identify surfaces of the PV 3C domain of 3CD with the potential to serve as sites of PIP binding. The results from computation were validated empirically by using nuclear magnetic resonance (NMR) spectroscopy. The PIP-binding site overlaps the well-established RNA-binding site of PV 3C (Amero et al., 2008). We characterized the PIP-binding specificity of 3C in a soluble system as well as in the context of a lipid bilayer. Both approaches revealed broad, yet specific, binding to a combination of mono-, bis-, or tris-phosphorylated phosphoinositides. Binding of PV 3C to PIPs and RNA was mutually exclusive. All-atom molecular dynamics (MD) simulations of 3C interacting with PI4P- or PI(4,5)P<sub>2</sub>-containing membranes revealed PIP clustering and a multivalent interaction with 3C. The conformation of 3C on the membrane was modulated by the nature of the bound PIP, perhaps regulating 3C function. This model for the interaction of PV 3C with a lipid bilayer suggests that the localization of 3C domain-containing proteins is driven by PIP abundance rather than the specificity of the PIP-binding domain. The versatile use of an RNA-binding surface of a PV protein for PIP binding as well may suggest a similar duality of function in related RNA-binding proteins of other RNA viruses.

## RESULTS

### Molecular-Docking Simulations Reveal Putative PIP-Binding Sites on PV 3C

The availability of structural data for PV 3C permitted use of a molecular-docking algorithm to perform a blind screen for putative PIP-binding sites. We prepared the structure of PI4P by modifying the PI(4,5)P<sub>2</sub> ligand extracted from the NMR complex structure of HIV-1 MA protein bound to PI(4,5)P<sub>2</sub> (PDB: 2H3Z) (Saad et al., 2006). The docking study of flexible PI4P with 20

active torsions to 3C protein was carried out by using the AutoDock 4.2 suite of programs. Results from 100 3C-PI4P docking trials predicted two clusters on 3C capable of interacting with PI4P, where 94% of the trials appeared in the major cluster and the remaining 6% appeared in the minor cluster (Figure 1A). The major cluster is located near the N-terminal helix, which is positioned adjacent to a conserved loop implicated in RNA binding (Amero et al., 2008). The minor cluster is on the opposite side of the N terminus of 3C (Figure 1A).

Ninety-four percent of the docking solutions in the major cluster exhibited a similar head group orientation. Red spheres indicate the position of the phosphate at position four of the inositol ring (Figure 1A). In contrast, the orientation of the fatty acyl chains varied for each docking solution. Docking results indicated that K12, R13, and R84 of the major cluster interact PI4P (Figure 1A). Similarly, K108 and R143 of the minor cluster are positioned to interact with PI4P (Figure 1A). These residues are highly conserved in the 3C proteins of all prototype viruses in the *Enterovirus* genus of the *Picornaviridae* family (Figure 1B). Even though the sequence similarity between members of the genus ranges from 40% to 60%, the basic nature of K12, R13, R84, and R143 were conserved, whereas that of K108 was not (Figure 1B).

### Validation of PIP-Binding Sites by NMR

To test the validity of our docking observations, we titrated <sup>15</sup>N-labeled 3C protein with soluble dibutyl-PI4P to observe potential NMR chemical shift perturbations (CSPs), which would indicate chemical environment changes in the presence of PI4P (Figure 2). Out of the three basic residues of the major cluster that were predicted to interact with the PI4P, R13 showed the largest CSP (Figure 2A). There were also smaller CSPs associated with K12 and R84 (Figure 2A). However, we did not observe any CSPs for the minor cluster residues K108 and R143.

As seen in Figure 2B, the addition of PI4P resulted in a number of CSPs beyond that of K12, R13, and R84. CSPs at least 1 SD above the mean were considered to be significantly different (CSP > 0.019 ppm). Many of these residues were not in the immediate vicinity of a docked PI4P molecule. For example, A9, M10, and N14 are located at the N terminus of 3C at a distance from PI4P but all showed significant CSPs (Figure 2B). These and other perturbations could be caused by other structural changes conferred by PI4P binding.

### Broad PIP-Binding Activity of 3C Observed in Solution

To assess PIP binding to 3C empirically and evaluate specificity of any observed binding, we used a fluorescence polarization (FP)-based PIP-binding assay (Ceccarelli et al., 2007; Kolli et al., 2015). This assay employed water-soluble dihexyl-PIPs that are BODIPY-FL-labeled at the *sn*-1 position (Figure 3A). Once excited by plane-polarized light, the unbound form of the fluorescent ligand depolarizes the emitted light due to its small size and rapid rotation. In contrast, the bound form of the fluorescent ligand has a larger molecular volume, which reduces the rotation such that the emitted light remains in the same plane as that used for excitation for a longer period of time (Figure 3A). This approach was validated by using the PLC- $\delta$ 1 PH domain as a positive control, which showed PI(4,5)P<sub>2</sub> binding specificity, as expected (Figure S1) (Harlan et al., 1994).



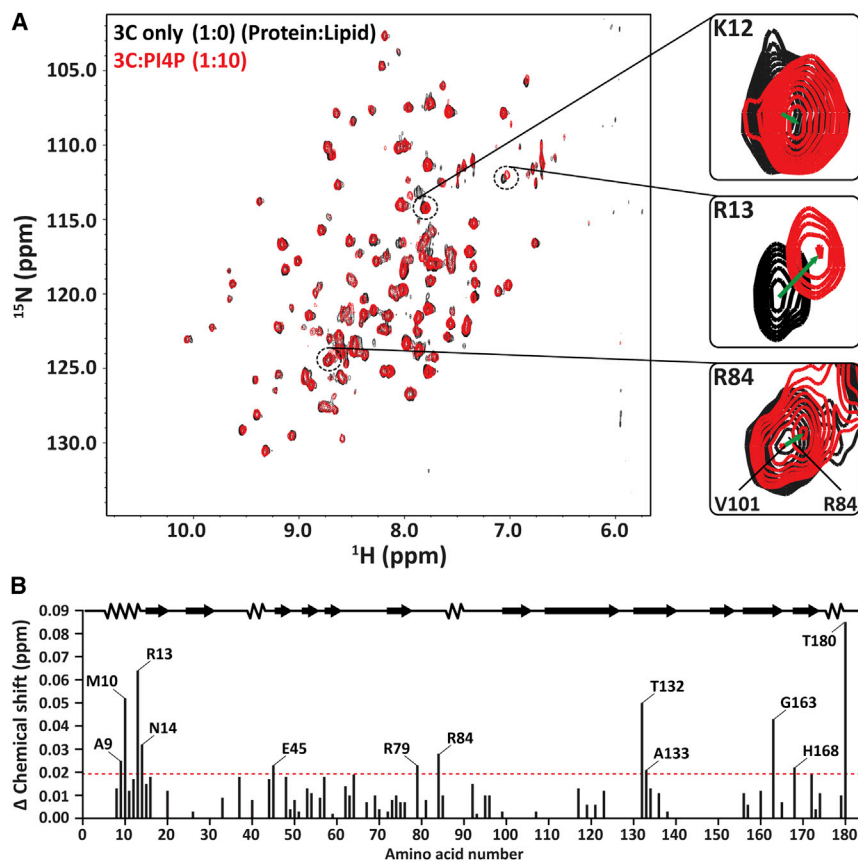

**Figure 2. NMR Spectral Perturbations Reveal the Interaction between 3C and PI4P**

(A) An overlay of  $^1\text{H}$ - $^{15}\text{N}$  HSQC spectra of free 3C (black) and 3C in a complex with dibutyl-PI4P (red). Right: close-up view of the chemical shift perturbations (CSPs) for K12, R13, and R84, which are implicated in PI4P-binding by docking.

(B) A bar graph showing CSPs induced throughout 3C by PI4P binding. The total chemical shift change ( $\Delta\delta_{\text{total}}$ ) depends on the chemical shift changes in the  $^1\text{H}$  ( $\Delta\delta_{\text{H}}$ ) and  $^{15}\text{N}$  ( $\Delta\delta_{\text{N}}$ ) dimensions according to  $\Delta\delta_{\text{total}} = (\Delta\delta_{\text{H}}^2 + 0.2 \Delta\delta_{\text{N}}^2)^{0.5}$ . Residues with significant CSPs (above the red line) are indicated. CSPs at least 1 SD above the average were considered to be substantial ( $\Delta\delta_{\text{total}} = 0.019$  ppm). These results are in agreement with the docking analyses, which show PI4P-binding toward the N terminus of 3C.

binding: K12, R13, and R84. It should be noted that the CSPs induced by addition of PI4P (Figure 2A) or RNA (Figure 3I) exhibited different trajectories. The addition of PI4P to the 3C-RNA complex (Figure 3I) led to resonance positions similar to that of the 3C-PI4P complex (Figure 2A), suggesting that PI4P competed out RNA and that PI4P and RNA binding were mutually exclusive.

### Broad PIP-Binding Activity of 3C Observed on Membranes

It is possible that the context in which a PIP is presented contributes to binding affinity and/or specificity. To address this question, we employed a pH-modulation assay to monitor protein binding to a planar-supported lipid bilayer (SLB) in a microfluidic device (Jung et al., 2009; Shengjuler et al., 2017). The SLB is a stable model membrane system, and the composition of the membrane can be easily tailored to probe interactions of specific lipids with proteins. The SLB used here employed three lipids, the structures of which are illustrated in Figure 4A. A pH-sensitive dye, *ortho*-sulforhodamine B-POPE (*o*SRB-POPE), is embedded into the SLB and used to probe protein binding by detecting changes in the local electric field (Figure 4B). Upon binding of 3C, which is positively charged at the experimental pH, the interfacial potential increases and more hydroxide ions are recruited locally. As a result, the fluorescence signal decreases (Figures 4B and S2).

In these studies, we used 1-palmitoyl-2-oleoyl-*sn*-glycero-3-phosphatidylcholine (POPC) as the primary component of the

PI(4,5)P<sub>2</sub>, all with essentially the same affinity (Table 1). PIP binding to 3C in the context of a membrane also required the phosphates because PI binding was weak (Table 1). Worth noting, PI binding did occur when compared with POPC alone; however, we were unable to produce a complete binding isotherm because of the extremely high concentration of protein required. The presence of PI will produce a net negative charge on the membrane, so the interaction with the basic surface of 3C makes sense. To test the possibility that negative charge alone can promote binding of 3C to the membrane, we performed an experiment in a membrane containing 1-palmitoyl-2-oleoyl-*sn*-glycero-3-phospho-L-serine (POPS). The presence of POPS will also produce a net negative charge on the membrane. The affinity of 3C for the POPS-containing membrane was on par with that observed for the PI-containing membrane (Table 1).

### 3C-Induced Clustering of PIPs and PIP-Induced Conformations of 3C Observed by MD Simulations

The availability of the Anton supercomputer made it possible to perform an all-atom MD simulation of the interaction of PV 3C with a POPC bilayer containing either PI4P or PI(4,5)P<sub>2</sub> in an aqueous environment containing Na<sup>+</sup> and Cl<sup>-</sup> ions (Li and Buck, 2017). The simulation was run for 400 ns, and the last 300 ns of the trajectory was used for analysis. A run time of 400 ns is likely insufficient to obtain a converged simulation, so the orientations and cluster sizes observed here may represent only a snapshot on a path to the fully equilibrated state. The major findings of the simulation are illustrated in Figure 5. Binding

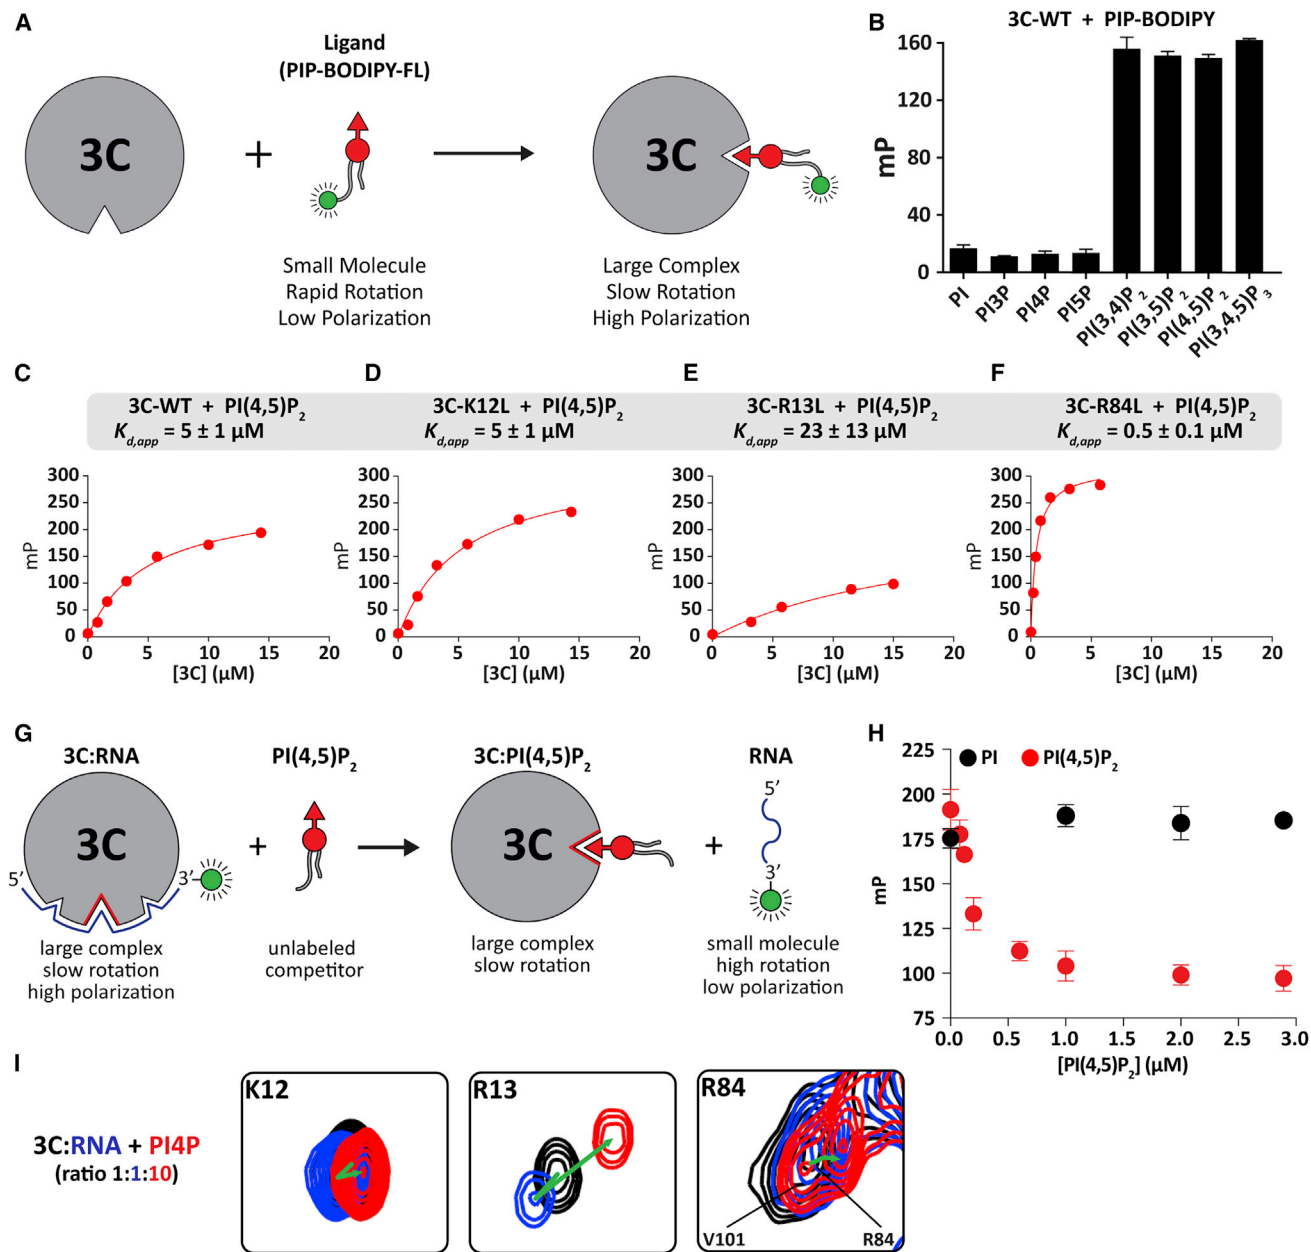

**Figure 3. 3C Binds to Phosphoinositides with Broad Specificity, and PIP Binding Competes with RNA Binding**

(A) The principles of the fluorescence polarization (FP)-based PIP-binding assay. Unbound form of the fluorescent ligand (PIP-BODIPY-FL) yields low polarization value due to its small size and rapid rotation. In contrast, the bound form yields a higher polarization value due to the overall size of the complex and its slow rotation.

(B) PIP-binding specificity of 3C. 3C binds to both bis- and tris-phosphorylated PIP species. Error bars represent the SEM ( $n = 3$ ).

(C–F) WT 3C and 3C variants (C): K12L (D), R13L (E), and R84L (F) bind to PI(4,5)P<sub>2</sub> with varying affinities. Shown is a hyperbolic fit for each dataset from which each apparent dissociation constant ( $K_{d,app}$ ) was obtained. Values are provided in Table 1.

(G) The principles of the FP-based competition assay. 3C:RNA (fluorescently labeled 11-mer) complex is pre-formed, which yields a high polarization value. As the unlabeled dibutyl-PI(4,5)P<sub>2</sub> competes out the bound RNA, the mP value decreases.

(H) FP-based competition experiments. The unlabeled PI(4,5)P<sub>2</sub> efficiently competes out the bound RNA, suggesting that these interactions are mutually exclusive. The competition experiment with PI competitor is used to show that binding to 3C is required for RNA displacement. Error bars represent the SEM ( $n = 3$ ).

(I) NMR-based competition experiments. 3C only (black); 3C:RNA complex (blue); 3C-PI4P complex (red). Changes in the direction of K12, R13, and R84 resonances (green arrow) in 2D space suggest that RNA and PIP interactions are mutually exclusive.

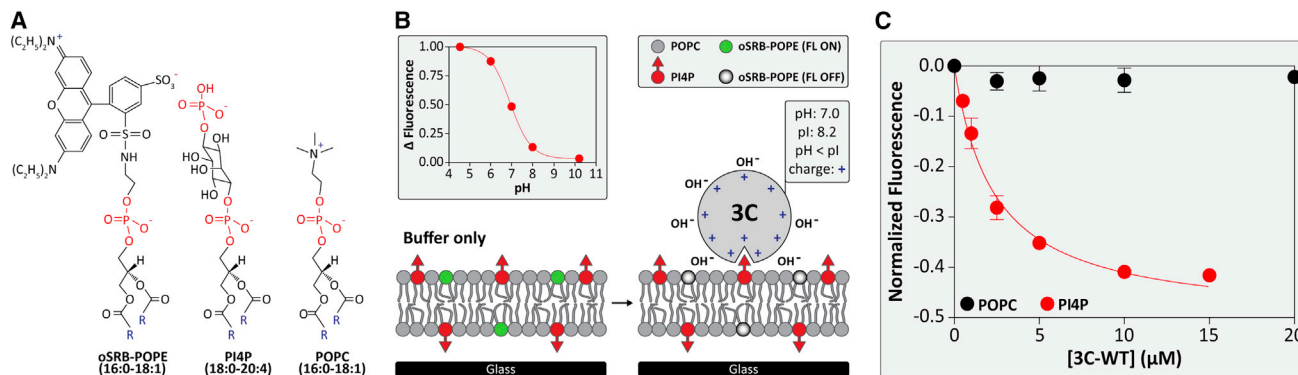

**Figure 4. Binding of a Mono-phosphorylated PIP to 3C in the Context of a Membrane**

(A) Chemical structures of the supported lipid bilayer (SLB) components; pH-sensitive oSRB-POPE; PI4P; and POPC. "R" represents the fatty acyl chains. (B) Schematic diagram illustrating the principles of the SLB-binding experiment. In the absence of 3C, the fluorescent probe is in its "on state" (left). Upon binding to the membrane, the interfacial potential is increased, causing the fluorescent probe to switch to its "off state" (right). The pH-response curve of the fluorescent probe in a bilayer containing 92 mol% POPC, 7.5 mol% PI4P, and 0.5 mol% oSRB-POPE is shown. (C) 3C binding to PI4P-containing SLBs. Change in fluorescence intensity was observed as a function of 3C concentration, which was normalized to a reference channel. Shown is a hyperbolic fit of the dataset. The apparent dissociation constant for 3C-PI4P interaction is  $2.4 \pm 0.2 \mu\text{M}$ . 3C was unable to bind to pure POPC membranes. Error bars represent the SEM ( $n = 3$ ).

of 3C induced clustering of at least five PIP molecules in the bilayer, independent of the nature of the PIP used (Figures 5A and 5B). Although the same residues of 3C were used to interact with both PIPs, the orientation of 3C differed slightly when bound to PI4P compared with that bound to PI(4,5)P<sub>2</sub> (Figures 5A and 5B). For reference, residues of the protease active site have been indicated by black spheres. The orientation of the active site in Figure 5A is clearly different than observed in Figure 5B. This analysis expanded the number of residues interacting with PIP head groups to include residues in regions observed by NMR, for example D32, K156, and R176 (Figures 5A and 5B). Interestingly, the contribution of D32 to 3C-PIP interface was mediated by two Na<sup>1+</sup> ions in the case of PI4P (Figure 5A), and one Na<sup>1+</sup> ion in the case of PI(4,5)P<sub>2</sub> (Figure 5B). A surface representation of 3C interacting with PIPs in the context of the membrane showed that 3C is propelled above the membrane by the head groups (Figures 5C and 5D). The N terminus of 3C was an exception. Rotation of 3C to bring the N terminus into view showed that the N terminus has a more substantive interaction with the outer leaflet of the bilayer, albeit of a non-specific nature (Figures 5E and 5F). The conformation and interaction of the N terminus with membrane was also influenced by the PIP present (Figures 5E and 5F). The residues involved in the dominant membrane contacts belong to the few segments that contain K12, R13, R84, and adjacent residues (Figure S3). If clustering actually occurs, then the apparent dissociation constant should be sensitive to the mole fraction of PI4P or PI(4,5)P<sub>2</sub> present. As shown in Figure S4 for PI4P, our data are consistent with a large reduction in apparent binding affinity when the mole fraction of PI4P is reduced.

#### SAXS Reveals Flexibility of the N Terminus of PV 3C

For the N-terminal residues of 3C to exhibit such conformational flexibility and diverse interactions with membranes, the solution behavior would have to be more dynamic than predicted by the crystal structure (Mosimann et al., 1997). To evaluate the solution

behavior of 3C, we performed small-angle X-ray scattering (SAXS) experiments. Figure 6A shows the scaled scattering profiles of 3C at concentrations ranging from 3.2 to 13.0 mg/mL. The overlap of the scaled curves at the low ends of scattering angles was consistent with the protein remaining monomeric over this concentration range in agreement with the NMR and dynamic light scattering studies (Chan et al., 2016). The scattering data at the low-angle end showed a linear correlation, satisfying the Guinier approximation ( $qR_g < 1.3$ ), from which we determined a radius of gyration ( $R_g$ ) of 17.26 Å (Figure 6A). The  $R_g$  derived from the Guinier approximation was in good agreement with that estimated from the pair-distance distribution function  $P(r)$  calculated by GNOM (real-space  $R_g = 17.72 \text{ Å}$ , reciprocal-space  $R_g = 17.76 \pm 0.13 \text{ Å}$ ) (Figure 6B). From the calculated  $P(r)$ , the maximum particle dimension of the protein was estimated to be 65 Å (Figure 6B). The asymmetric shape of the distribution function suggested the presence of a tail in the solution structure of 3C. The values of  $R_g$  and  $D_{\text{max}}$  from SAXS data also suggested that the protein exists as a monomer in solution. Furthermore, the estimated molecular mass of  $22.2 \pm 0.9 \text{ kDa}$  (derived from Porod volume) or  $20.5 \pm 1.1 \text{ kDa}$  (derived from SAXS MoW calculation) was in very good agreement with the calculated molecular mass of a monomer (19.6 kDa).

We compared the calculated scattering profiles of the crystal structure and the average MD structure to the experimental data. As shown in Figure 6C, both structures agreed well with the experimental data. However, the calculated curve from the average MD structure showed a slightly better fitting to the SAXS data relative to the crystal structure ( $\chi = 1.57$  for crystal structure versus  $\chi = 1.47$  for MD structure). Next, we built the *ab initio* low-resolution SAXS model using DAMMIN and DAMMIF programs; ten independent models from each program were generated and averaged. The models were highly similar; the average values of the normalized spatial discrepancy (NSD), which represents the similarity among the models, were  $0.563 \pm 0.010$  and  $0.698 \pm 0.064$  for DAMMIN and DAMMIF

**Table 1. Apparent Dissociation Constants for 3C-WT and Its Variants from PIP-on-a-Chip Experiments**

| Lipid                 | $K_{D,app} \pm SEM$ ( $\mu$ M) | Membrane Composition  | Mol % <sup>a</sup> |
|-----------------------|--------------------------------|-----------------------|--------------------|
| POPC                  | no binding                     | POPC                  | 99.5               |
| PI                    | $\geq 25^b$                    | POPC                  | 92.0               |
|                       |                                | PI                    | 7.5                |
| PI3P                  | $2.7 \pm 0.2$                  | POPC                  | 92.0               |
|                       |                                | PI3P                  | 7.5                |
| PI4P                  | $2.4 \pm 0.2$                  | POPC                  | 92.0               |
|                       |                                | PI4P                  | 7.5                |
| PI(4,5)P <sub>2</sub> | $2.0 \pm 0.2$                  | POPC                  | 92.0               |
|                       |                                | PI(4,5)P <sub>2</sub> | 7.5                |
| POPS                  | $\geq 47^b$                    | POPC                  | 92.0               |
|                       |                                | POPS                  | 7.5                |

  

| Lipid                 | 3C-K12L       | 3C-R13L       | 3C-R84L         |
|-----------------------|---------------|---------------|-----------------|
| PI4P                  | $1.4 \pm 0.1$ | $4.7 \pm 0.3$ | $0.30 \pm 0.03$ |
| PI(4,5)P <sub>2</sub> | $1.1 \pm 0.1$ | $2.2 \pm 0.3$ | $0.30 \pm 0.02$ |

<sup>a</sup>Each membrane also contained 0.5 mol%  $\alpha$ SRB-POPE.

<sup>b</sup>PI and POPS binding as a function of 3C concentration was in the linear range. Assuming an amplitude similar to that of PI4P binding, yields the indicated values for  $K_{D,app}$ , which represent a lower limit.

models, respectively. Superimposing the average MD structure onto the SAXS model showed a very good agreement between these two models with an NSD of 0.66. The crystal structure showed less agreement with the SAXS model with an NSD of 0.92. The reconstructed low-resolution SAXS model clearly revealed the presence of an extended and highly dynamic N-terminal helix of 3C, the volume of which exceeded the volume of a helix that is 14 residues in length (Figure 6D). Worth noting, the amphipathic nature of this helix (Figure S5) may also contribute to the alternative conformations observed on membranes (Figures 5E and 5F).

## DISCUSSION

The membranes forming the genome-replication organelle of enteroviruses are enriched in PI4P. It is known that the RNA-dependent RNA polymerase domain, 3D, of enteroviruses binds to PI4P, although it is not clear where on the protein this binding occurs (Hsu et al., 2010). Because the 3CD protein accumulates to a much higher level in PV-infected cells than 3D, and 3CD has been implicated in formation and/or function of the genome-replication organelle (Oh et al., 2009), we used the available structural information for these proteins (Marcotte et al., 2007; Mosimann et al., 1997; Moustafa et al., 2015; Thompson and Peersen, 2004) to screen for PI4P-binding sites by using a molecular-docking algorithm (Goodsell et al., 1996; Morris et al., 1998). The observation of a putative PI4P-binding site on 3C was unexpected but exciting, as it was now very possible that trafficking of PV proteins to the site of genome replication might be facilitated by the use of new structural classes of PI4P-binding domains (Figure 1). Our focus on 3C was motivated by the arsenal of structural and computational resources available to study PV 3C that would facilitate identification and characterization of the PI4P-binding site, including a

near-complete backbone NMR resonance assignment (Amero et al., 2008).

Using a solution- and bilayer-based assay for PIP binding, we observed PIP binding by 3C (Figures 3 and 4). Titration of PI4P into a solution containing 3C caused CSPs that were consistent with the major PI4P-binding site observed computationally (Figure 2A). However, the CSPs also included other residues (Figure 2B), in particular residues known to contribute to the RNA-binding activity of 3C (Amero et al., 2008). PIP binding was indeed competitive with RNA binding (Figures 3H and 3I). For a small molecule such as PI4P to cause so many CSPs or to compete with a substantially larger RNA, either multiple molecules of PI4P bind to the protein or a single molecule of PI4P induces a large change in the conformation and/or dynamics of the protein. Analysis of NMR spectra were inconsistent with large-scale changes in conformation or dynamics as most of the resonance positions and intensities were not affected by PI4P binding (Figure 2). MD simulations were consistent with multiple PIPs binding to PV 3C along the shallow cleft used for RNA binding (Figure 5). While the negative charge of the phospholipid head group contributed to PIP binding, the display of the charge on the inositol ring contributed to high-affinity binding (Table 1). In this regard, neither the location of the phosphate on the inositol ring nor the number of phosphates on the inositol ring mattered for 3C binding (Table 1), although the nature of the PIP influenced the conformation of 3C bound to membrane observed computationally (Figure 5). MD simulations indicated that one contributor to the PIP-dependent conformation is the flexibility of the N terminus (compare Figures 5E and 5F). Such conformational flexibility of the 3C N terminus was also observed in solution using SAXS (Figure 6).

The PIP-binding site structure, corresponding specificity, and extreme capacity to cluster PIPs differs substantially from known cellular PIP-binding domains. Most cellular PIP-binding domains contain a solvent-accessible, basic cavity to which a PIP binds (Lemmon, 2008). In certain cases, spatial restriction within the cavity enables stereospecificity to the interaction with a PIP head group. Even though the putative PIP-binding sites on 3C are enriched in basic residues, the surface is shallow by comparison with cellular PIP-binding domains. While cellular PIP-binding proteins are known to bind more than one PIP or a single PIP in combination with another anionic phospholipid, the maximum number is usually two PIPs (Moravcevic et al., 2012; Yamamoto et al., 2016). The expanded specificity does not represent mere sloppiness, but permits regulation by the simultaneous presence of multiple PIPs, which has been referred to as coincidence detection (Moravcevic et al., 2012). The broad specificity of the 3C PIP-binding site is unprecedented in mammalian systems but broad specificity may be more common in the yeast, *Saccharomyces cerevisiae* (Yu et al., 2004). This circumstance may not cause a problem for the virus because PI4P synthesis is induced immediately upon infection, and the levels of other PIPs in the cell exist at a much lower level (van Meer et al., 2008). Much of the apparent affinity of 3C for the PIP-containing membrane derives from the multivalent nature of the interaction (Figure 5). Clustering of PIPs has been suggested by MD of cellular PIP-binding proteins bound to membranes; however, binding of two PIPs is most common (Yamamoto et al., 2016).



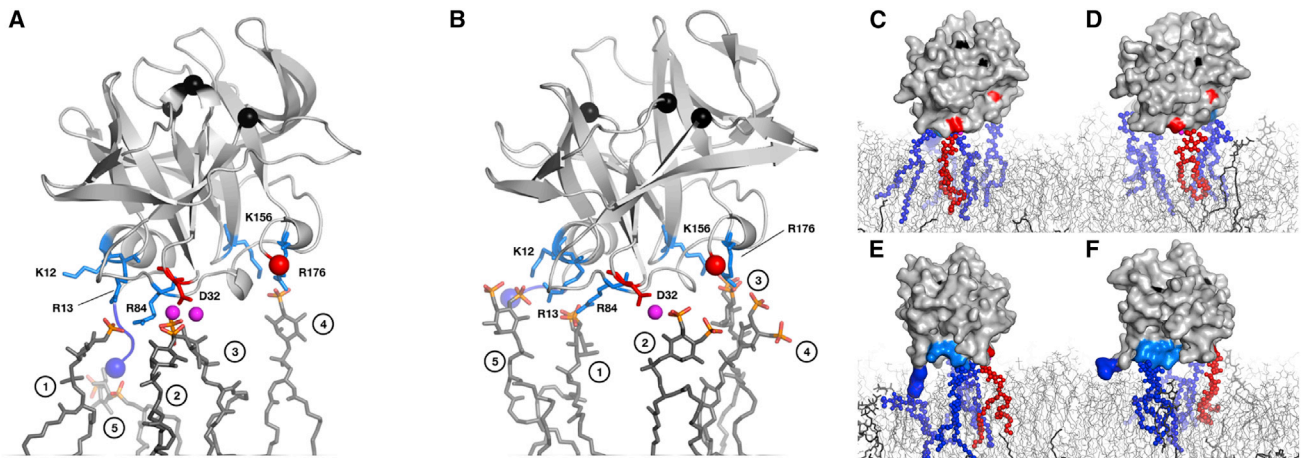

### Figure 5. 3C Interacts with Multiple PI4P and PI(4,5)P<sub>2</sub> Ligands

(A and B) All-atom molecular dynamics simulations of (A) 3C binding to a PI4P-containing membrane, or (B) to a PI(4,5)P<sub>2</sub>-containing membrane. Snapshots of selected simulations show that 3C interacts with five, clustered PI4P or PI(4,5)P<sub>2</sub> molecules. PI4P and PI(4,5)P<sub>2</sub> are shown as dark gray sticks with phosphates colored orange (phosphorus) and red (oxygen). 3C is shown as a light gray ribbon; residue side chains are colored as follows: light blue (positive side chains) and red (negative side chains) sticks. Also shown are: sodium ions as magenta spheres; the amino and C termini as blue and red spheres, respectively; 3C protease active-site residues as black spheres. Specific interactions are as follows, with number in parentheses referring to head group in panel: (1) R13 and R84; (2) D32, mediated by sodium ions; (3) D32 for PI4P in (A) mediated by sodium, or R176 for PI(4,5)P<sub>2</sub> in (B); (4) K156 and R176; and (5)  $\alpha$ -amino group of G1 for PI4P in (A), or K12 and R13 for PI(4,5)P<sub>2</sub> in (B).

(C and D) Surface representations of 3C (light gray) with PI4P-containing membrane in (C) or PI(4,5)P<sub>2</sub>-containing membrane in (D) (blue, red and dark gray sticks); PC (light gray lines). Charged interactions between 3C and the respective ligands are shown as blue (positive) or red (negative) spheres to correspondingly colored sticks.

(E and F) Same as (C) and (D) rotated 90° counterclockwise about the vertical axis of the page to reveal the amino terminus (blue) interacting with the membrane (light gray lines). PI4P-containing membrane was composed of 244 PC and 20 PI4P lipids; PI(4,5)P<sub>2</sub>-containing membrane was composed of 244 PC and 20 PI(4,5)P<sub>2</sub> lipids. All lipids were equally distributed on each monolayer of the membrane. The simulation was conducted at 310K for 400 ns; the last 300 ns of the trajectories were used for analysis.

Binding of five PIPs to the same protein seems extraordinary (Figure 5). Whether or not the virus requires substantial PIP clustering and whether or not such substantial PIP clustering causes a biological response are questions that need to be addressed in the future. One class of PIP-binding proteins uses an unstructured basic domain to bind to a leaflet of the bilayer and sequester PIPs (McLaughlin et al., 2002). Among the best-characterized members of this class of proteins is MARCKS, myristoylated alanine-rich C kinase substrate (McLaughlin et al., 2002). PIP sequestration causes an increase in PIP concentration, which may serve to increase signaling intensity when acted upon by effectors such as phospholipases. The process of sequestration can be tuned down or turned off by the presence of Ca<sup>2+</sup> (McLaughlin et al., 2002). Similarly, 3C bound to a membrane should sequester PIPs. Indeed, 3C binding to membranes at any significant level could act as a phosphoinositide sink, given the presence of contact sites to connect all of the intracellular membranes (Helle et al., 2013; Raiborg et al., 2016). The ability of a virus to sequester phosphoinositides could have a profound, debilitating effect on the cell.

PIP binding by 3C is also unique when compared with well-characterized PIP-binding proteins of RNA viruses, of which there are only two: HIV MA protein and Ebola VP40 (matrix) protein. The role of viral matrix proteins is to bridge the genome or some genome-containing ribonucleoprotein complex to the membrane used to envelope the virus as it buds from the cell. Both of these viral proteins appear to bind specifically to

PI(4,5)P<sub>2</sub>. PIP binding signals to the protein that it has reached the destination for assembly. In the case of MA, PIP binding triggers the exposure and insertion of its myristoylated N terminus into the plasma membrane (Saad et al., 2006). In the case of VP40, PIP binding promotes oligomerization (Johnson et al., 2016). Both HIV MA and Ebola VP40 assemble into oligomers, which cluster PIPs, but not to the same extreme as predicted for 3C (Johnson et al., 2016; Saad et al., 2006). Both of these matrix proteins bind RNA. In the case of Ebola VP40, there is no evidence to suggest that RNA competes with PIP binding (Gomis-Ruth et al., 2003). However, competition may exist for HIV MA (Chukkapalli et al., 2010).

Non-structural protein 5A (NS5A) from hepatitis C virus binds PI(4,5)P<sub>2</sub> and, to a lesser extent, PI(3,4)P<sub>2</sub>, through its N-terminal amphipathic  $\alpha$  helix (Cho et al., 2015). The motif used has been referred to as the basic amino acid PIP2 pincer (BAAPP) domain (Cho et al., 2015). This motif is nothing more than two basic amino acids flanking a series of hydrophobic residues displayed on a helix, which presumably penetrates into the bilayer. The BAAPP motif can be found in amphipathic  $\alpha$  helices of cellular and viral proteins; however, the function is not known. Indeed, such a motif might exist in the N terminus of 3C (Figure S5). In the case of 3C, we propose that this helix just augments membrane binding without any specificity (Figures 5E and 5F). How the BAAPP domain confers specificity is not known. It is worth noting that NS5A is an RNA-binding protein. The organization described for 3C, amphipathic  $\alpha$  helix followed by an

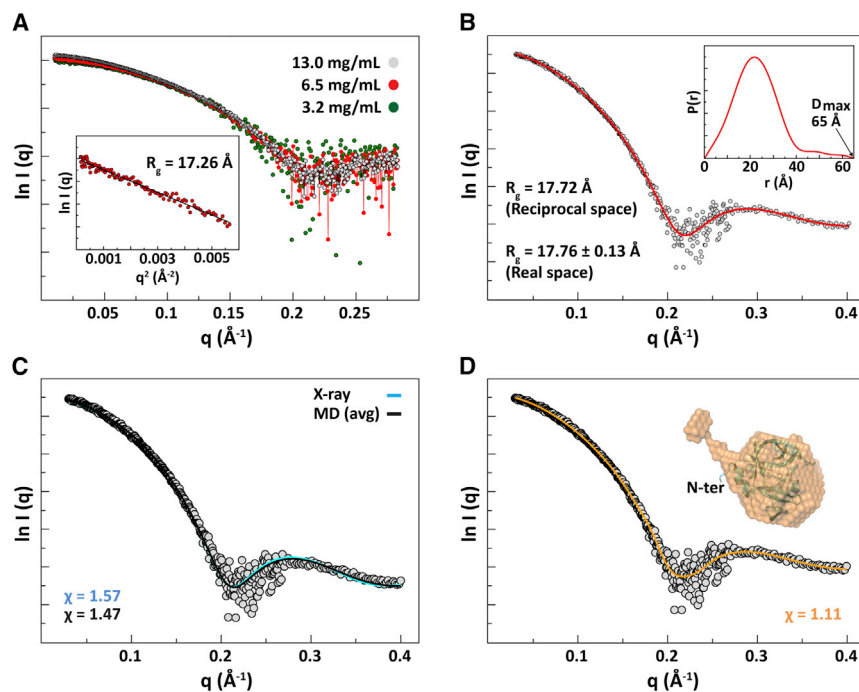

**Figure 6. The N Terminus of 3C Is Dynamic as Revealed by SAXS**

(A) Scattering profiles of 3C obtained at three different protein concentrations. Scaling factors were applied for the low-concentration data. The inset shows the linear fitting of the Guinier plot from which radius of gyration ( $R_g$ ) was determined. (B) The transformed scattering profile calculated by GNOM from the pair-distance-distribution function,  $P(r)$ , which is shown in the inset. The maximum particle dimension and the  $R_g$  obtained from  $P(r)$  are indicated. The estimated  $R_g$  from GNOM is in good agreement with that obtained from Guinier fitting. (C) The calculated scattering profiles of the crystal structure of poliovirus 3C monomer (cyan) (Mosimann et al., 1997) and the average MD structure (black) (Moustafa et al., 2015) fitted to the experimental SAXS data (gray). Both structures fit well; however, the average MD structure showed slightly better fitting compared to the crystal structure as indicated by its lower  $\chi$  value. (D) The reconstructed SAXS filtered model calculated by DAMMIN is shown as an orange transparent surface with the crystal structure superimposed. The SAXS model clearly shows an extended N terminus compared to the crystal structure. The calculated scattering profile of the SAXS model (orange) fitted to the experimental data (gray) is also shown.

RNA-binding domain, therefore applies to NS5A. It is compelling to speculate that this RNA-binding domain might also interact with PIPs.

Other virus families encode 3C-like proteases (3CL), specifically the *Caliciviridae* and *Coronaviridae*. One of the most prominent members of the calicivirus family is Norwalk virus and other human noroviruses (NoVs), the so-called cruise-ship diarrhea viruses. Prominent members of the coronavirus family include severe acute respiratory syndrome virus (SARS CoV) and Middle East respiratory syndrome virus (MERS CoV). PV 3C, NoV 3CL (also known as NS6) and SARS/MERS CoV 3CL (also known as nsp5) share a chymotrypsin-like fold (Anand et al., 2002; Hilgenfeld, 2014; Mosimann et al., 1997; Zeitler et al., 2006). The protease active sites are quite similar. Structurally, NoV 3CL is extremely close to PV 3C, with clear conservation of residues corresponding to: K12, R13, D32, K156, and R176. Residues of SARS/MERS CoV 3CL are not so highly conserved, but the surface of this protein corresponding to the PIP-binding surface of PV 3C is clearly basic. There is one report of RNA binding by NoV 3CL (Viswanathan et al., 2013) but none for the CoV proteins. The possibility that members of other virus families of medical importance encode a PIP-binding protein, such as that of PV 3C, suggests that this activity may represent a target with broad-spectrum therapeutic potential. Empirical studies of the NoV and CoV 3CL proteins will be required to assess this possibility.

Our computational studies suggested that 3C interacted with a single PIP mediated by K12 and R84 (Figure 1A). Although R13 was nearby, a role for this residue in PIP binding was not suggested (Figure 1A). Removal of the positive charge from K12 had no impact on PIP binding, removal from R84 increased PIP-binding affinity, but removal from R13 weakened PIP-binding

affinity (Figures 3C–3F). A role for R13 and R84 in PIP binding was supported by NMR experiments, but the evidence for K12 was weak (Figure 2B). So, while the molecular-docking simulation pointed us in the right direction, the molecular details of the putative interaction were not correct. The inaccuracy may have been caused by our attempt to dock a single PI4P instead of multiple PIPs. The 3C-membrane-binding simulation (Figures 5A and 5B) produced results that were consistent with both the NMR and mutagenesis experiments. K12 has either no or a minor role in binding PI4P (Figure 5A) or PI(4,5)P<sub>2</sub> (Figure 5B). R13 interacts directly with one (Figure 5A) or two (Figure 5B) PIP phosphates. R84 is near the Na<sup>+</sup> ions at the interface. We do not understand the structural basis for the enhancement of binding conferred by the R84L substitution. However, given the apposition of position 84 to the bilayer, Leu may penetrate the bilayer and interact with the acyl chains of the phospholipids. Structural and/or computational studies in the future will hopefully fill this gap.

The broad repertoire of PIPs bound by 3C may occur *specifically* and regulate the conformation of 3C. Although the same collection of 3C residues appear to be involved in interactions with both PI4P and PI(4,5)P<sub>2</sub>, the architecture of the interface is different (Figure 5). It is possible that these apparent states are interconvertible and just reflect the short duration of the simulated trajectory. However, it is possible that different PIPs stabilize different states. For the K-Ras4A protein, it is known that POPS stabilizes a different conformation of this protein than PI(4,5)P<sub>2</sub> (Li and Buck, 2017). During infection, 3C functions primarily in the context of a larger precursor, 3CD. 3CD is known to have many functions before, during and after genome replication (Cameron et al., 2010; Oh et al., 2017). Having functions dictated by conformational states of the protein stabilized by

phospholipid composition of the membrane to which 3CD is bound would be an elegant explanation of the regulation of the many activities of this protein. Deliberate interrogation of this hypothesis is warranted.

In conclusion, in an effort to begin to identify proteins and mechanisms that PV uses to recognize PIPs, we have discovered that nature has been creative and adapted a viral RNA-binding surface to perform this additional task. The outcome is a new structural class of PIP-binding proteins with the capacity for multivalent binding to any mono-, bis-, or tris-phosphorylated PIP, but with a unique conformational state determined by the nature of the bound PIP. It is likely that a similar mechanism exists in NoVs and CoVs, suggesting a role for PIPs in the biology of these viruses even though empirical support of this possibility is needed.

## STAR★METHODS

Detailed methods are provided in the online version of this paper and include the following:

- **KEY RESOURCES TABLE**
- **CONTACT FOR REAGENT AND RESOURCE SHARING**
- **EXPERIMENTAL MODEL AND SUBJECT DETAILS**
  - Cell Lines
- **METHOD DETAILS**
  - Materials
  - Construction of Expression Plasmids
  - Molecular Docking
  - Small Angle X-ray Scattering (SAXS) Analysis
  - Sequence Alignments
  - Expression and Purification of PV 3C
  - Expression and Purification of PLC $\delta$ 1 PH Domain
  - Isotopic Labeling and Sample Preparation for NMR
  - NMR Spectroscopy
  - Fluorescence Polarization-Based Phosphoinositide Binding Assay
  - Small Unilamellar Vesicle (SUV) Preparation
  - Glass Cleaning Procedure
  - Supported Lipid Bilayer (SLB) Binding Experiments
  - Photomask Design
  - Silicon Mold Fabrication
  - Molecular Dynamics Simulations of PV 3C-membrane Interaction
- **QUANTIFICATION AND STATISTICAL ANALYSIS**

## SUPPLEMENTAL INFORMATION

Supplemental Information includes five figures and can be found with this article online at <https://doi.org/10.1016/j.str.2017.11.001>.

## AUTHOR CONTRIBUTIONS

Conceptualization, C.E.C.; Methodology, all authors; Validation, D.S., Y.M.C., S.S., I.M.M., Z.-L.L., and D.W.G.; Formal Analysis, D.S., Y.M.C., S.S., I.M.M., Z.-L.L., and D.W.G.; Investigation, D.S., Y.M.C., S.S., I.M.M., Z.-L.L., and D.W.G.; Writing – Original Draft, D.S. and C.E.C.; Writing – Review & Editing, all authors; Visualization, D.S., Y.M.C., I.M.M., and D.W.G.; Supervision, M.B., P.S.C., D.D.B., and C.E.C.; Project Administration, C.E.C.; Funding Acquisition, M.B., P.S.C., D.D.B., and C.E.C.

## ACKNOWLEDGMENTS

We thank Calvin Yeager and Jamie J. Arnold for contributing to the assembly and submission of the manuscript. Anton 2 computer time was provided by the Pittsburgh Supercomputing Center (PSC) through NIH Grant *R01GM116961*. Funding for this study was obtained from the following sources: C.E.C., AI053531 from NIAID, NIH; D.D.B., AI091985 and AI104878 from NIAID, NIH; P.S.C., N00014-14-1-0792 from Office of Naval Research; and M.B., GM112491 from NIGMS, NIH.

Received: July 28, 2017

Revised: September 18, 2017

Accepted: November 1, 2017

Published: December 5, 2017

## REFERENCES

- Amero, C.D., Arnold, J.J., Moustafa, I.M., Cameron, C.E., and Foster, M.P. (2008). Identification of the oril-binding site of poliovirus 3C protein by nuclear magnetic resonance spectroscopy. *J. Virol.* *82*, 4363–4370.
- Anand, K., Palm, G.J., Mesters, J.R., Siddell, S.G., Ziebuhr, J., and Hilgenfeld, R. (2002). Structure of coronavirus main proteinase reveals combination of a chymotrypsin fold with an extra alpha-helical domain. *EMBO J.* *21*, 3213–3224.
- Balla, T. (2013). Phosphoinositides: tiny lipids with giant impact on cell regulation. *Physiol. Rev.* *93*, 1019–1137.
- Belov, G.A., Habbersett, C., Franco, D., and Ehrenfeld, E. (2007). Activation of cellular Arf GTPases by poliovirus protein 3CD correlates with virus replication. *J. Virol.* *81*, 9259–9267.
- Belov, G.A., and van Kuppeveld, F.J. (2012). (+)RNA viruses rewire cellular pathways to build replication organelles. *Curr. Opin. Virol.* *2*, 740–747.
- Cameron, C.E., Oh, H.S., and Moustafa, I.M. (2010). Expanding knowledge of P3 proteins in the poliovirus lifecycle. *Future Microbiol.* *5*, 867–881.
- Ceccarelli, D.F., Blasutig, I.M., Goudreaux, M., Li, Z., Ruston, J., Pawson, T., and Sicheri, F. (2007). Non-canonical interaction of phosphoinositides with pleckstrin homology domains of Tiam1 and ArhGAP9. *J. Biol. Chem.* *282*, 13864–13874.
- Chan, Y.M., Moustafa, I.M., Arnold, J.J., Cameron, C.E., and Boehr, D.D. (2016). Long-range communication between different functional sites in the picornaviral 3C protein. *Structure* *24*, 509–517.
- Cho, N.J., Lee, C., Pang, P.S., Pham, E.A., Fram, B., Nguyen, K., Xiong, A., Sklan, E.H., Elazar, M., Koytak, E.S., et al. (2015). Phosphatidylinositol 4,5-bisphosphate is an HCV NS5A ligand and mediates replication of the viral genome. *Gastroenterology* *148*, 616–625.
- Chukkappalli, V., Oh, S.J., and Ono, A. (2010). Opposing mechanisms involving RNA and lipids regulate HIV-1 Gag membrane binding through the highly basic region of the matrix domain. *Proc. Natl. Acad. Sci. USA* *107*, 1600–1605.
- Delaglio, F., Grzesiek, S., Vuister, G.W., Zhu, G., Pfeifer, J., and Bax, A. (1995). NMRPipe: a multidimensional spectral processing system based on UNIX Pipes. *J. Biomol. NMR* *6*, 277–293.
- Franco, D., Pathak, H.B., Cameron, C.E., Rombaut, B., Wimmer, E., and Paul, A.V. (2005). Stimulation of poliovirus synthesis in a HeLa cell-free in vitro translation-RNA replication system by viral protein 3CDpro. *J. Virol.* *79*, 6358–6367.
- Franke, D., and Svergun, D.I. (2009). DAMMIF, a program for rapid ab-initio shape determination in small-angle scattering. *J. Appl. Crystallogr.* *42*, 342–346.
- Gomis-Ruth, F.X., Dessen, A., Timmins, J., Bracher, A., Kolesnikowa, L., Becker, S., Klenk, H.D., and Weissenhorn, W. (2003). The matrix protein VP40 from Ebola virus octamerizes into pore-like structures with specific RNA binding properties. *Structure* *11*, 423–433.
- Goodsell, D.S., Morris, G.M., and Olson, A.J. (1996). Automated docking of flexible ligands: applications of autodock. *J. Mol. Recognit.* *9*, 1–5.
- Harlan, J.E., Hajduk, P.J., Yoon, H.S., and Fesik, S.W. (1994). Pleckstrin homology domains bind to phosphatidylinositol-4,5-bisphosphate. *Nature* *371*, 168–170.

- Helle, S.C., Kanfer, G., Kolar, K., Lang, A., Michel, A.H., and Kornmann, B. (2013). Organization and function of membrane contact sites. *Biochim. Biophys. Acta* *1833*, 2526–2541.
- Hilgenfeld, R. (2014). From SARS to MERS: crystallographic studies on coronaviral proteases enable antiviral drug design. *FEBS J.* *287*, 4085–4096.
- Hornak, V., Abel, R., Okur, A., Strockbine, B., Roitberg, A., and Simmerling, C. (2006). Comparison of multiple amber force fields and development of improved protein backbone parameters. *Proteins* *65*, 712–725.
- Hsu, N.Y., Ilnytska, O., Belov, G., Santiana, M., Chen, Y.H., Takvorian, P.M., Pau, C., van der Schaar, H., Kaushik-Basu, N., Balla, T., et al. (2010). Viral reorganization of the secretory pathway generates distinct organelles for RNA replication. *Cell* *141*, 799–811.
- Huang, D., Zhao, T., Xu, W., Yang, T., and Cremer, P.S. (2013). Sensing small molecule interactions with lipid membranes by local pH modulation. *Anal. Chem.* *85*, 10240–10248.
- Huang, J., and MacKerell, A.D., Jr. (2013). CHARMM36 all-atom additive protein force field: validation based on comparison to NMR data. *J. Comput. Chem.* *34*, 2135–2145.
- Johnson, B.A., and Blevins, R.A. (1994). NMRView: a computer program for the visualization and analysis of NMR data. *J. Biomol. NMR* *4*, 603–614.
- Johnson, K.A., Taghon, G.J., Scott, J.L., and Stahelin, R.V. (2016). The Ebola virus matrix protein, VP40, requires phosphatidylinositol 4,5-bisphosphate (PI(4,5)P2) for extensive oligomerization at the plasma membrane and viral egress. *Sci. Rep.* *6*, 19125.
- Jung, H., Robison, A.D., and Cremer, P.S. (2009). Detecting protein-ligand binding on supported bilayers by local pH modulation. *J. Am. Chem. Soc.* *131*, 1006–1014.
- Klauda, J.B., Venable, R.M., Freites, J.A., O'Connor, J.W., Tobias, D.J., Mondragon-Ramirez, C., Vorobyov, I., MacKerell, A.D., Jr., and Pastor, R.W. (2010). Update of the CHARMM all-atom additive force field for lipids: validation on six lipid types. *J. Phys. Chem. B* *114*, 7830–7843.
- Kolli, S., Meng, X., Wu, X., Shengjuler, D., Cameron, C.E., Xiang, Y., and Deng, J. (2015). Structure-function analysis of vaccinia virus H7 protein reveals a novel phosphoinositide binding fold essential for poxvirus replication. *J. Virol.* *89*, 2209–2219.
- Kozin, M.B., and Svergun, D.I. (2001). Automated matching of high- and low-resolution structural models. *J. Appl. Crystallogr.* *34*, 33–41.
- Lemmon, M.A. (2008). Membrane recognition by phospholipid-binding domains. *Nat. Rev. Mol. Cell Biol.* *9*, 99–111.
- Li, Z.-L., and Buck, M. (2017). Computational modeling reveals that signaling lipids modulate the orientation of K-Ras4A at the membrane reflecting protein topology. *Structure* *25*, 679–689.e2.
- Marcotte, L.L., Wass, A.B., Gohara, D.W., Pathak, H.B., Arnold, J.J., Filman, D.J., Cameron, C.E., and Hogle, J.M. (2007). Crystal structure of poliovirus 3CD protein: virally encoded protease and precursor to the RNA-dependent RNA polymerase. *J. Virol.* *81*, 3583–3596.
- McLaughlin, S., Wang, J., Gambhir, A., and Murray, D. (2002). PIP(2) and proteins: interactions, organization, and information flow. *Annu. Rev. Biophys. Biomol. Struct.* *31*, 151–175.
- Miller, S., and Krijnsse-Locker, J. (2008). Modification of intracellular membrane structures for virus replication. *Nat. Rev. Microbiol.* *6*, 363–374.
- Moravcevic, K., Oxley, C.L., and Lemmon, M.A. (2012). Conditional peripheral membrane proteins: facing up to limited specificity. *Structure* *20*, 15–27.
- Morris, G.M., Goodsell, D.S., Halliday, R.S., Huey, R., Hart, W.E., Belew, R.K., and Olson, A.J. (1998). Automated docking using a Lamarckian genetic algorithm and an empirical binding free energy function. *J. Comput. Chem.* *19*, 1639–1662.
- Morris, G.M., Huey, R., Lindstrom, W., Sanner, M.F., Belew, R.K., Goodsell, D.S., and Olson, A.J. (2009). Autodock4 and AutoDockTools4: automated docking with selective receptor flexibility. *J. Comput. Chem.* *16*, 2785–2791.
- Mosimann, S.C., Cherney, M.M., Sia, S., Plotch, S., and James, M.N. (1997). Refined X-ray crystallographic structure of the poliovirus 3C gene product. *J. Mol. Biol.* *273*, 1032–1047.
- Moustafa, I.M., Gohara, D.W., Uchida, A., Yennawar, N., and Cameron, C.E. (2015). Conformational ensemble of the poliovirus 3CD precursor observed by MD simulations and confirmed by SAXS: a strategy to expand the viral proteome? *Viruses* *7*, 5962–5986.
- Nielsen, S., Toft, K.N., Snakenborg, D., Jeppesen, M.G., Jacobsen, J., Vestergaard, B., Kutter, J.P., and Arleth, L. (2009). BioXTAS RAW, a software program for high-throughput automated small-angle X-ray scattering data reduction and preliminary analysis. *J. Appl. Crystallogr.* *42*, 959–964.
- Oh, H.S., Banerjee, S., Aponte-Diaz, D., Aligo, J., Lodeiro, M.F., and Cameron, C.E. (2017). Multiple poliovirus-induced organelles suggested by comparison of spatiotemporal dynamics of membranous structures and phosphoinositides. *Cold Spring Harb. Lab.* <https://doi.org/10.1101/135509>.
- Oh, H.S., Pathak, H.B., Goodfellow, I.G., Arnold, J.J., and Cameron, C.E. (2009). Insight into poliovirus genome replication and encapsidation obtained from studies of 3B-3C cleavage site mutants. *J. Virol.* *83*, 9370–9387.
- Parsley, T.B., Towner, J.S., Blyn, L.B., Ehrenfeld, E., and Semler, B.L. (1997). Poly (rC) binding protein 2 forms a ternary complex with the 5'-terminal sequences of poliovirus RNA and the viral 3CD proteinase. *RNA* *3*, 1124–1134.
- Pathak, H.B., Arnold, J.J., Wiegand, P.N., Hargittai, M.R., and Cameron, C.E. (2007). Picornavirus genome replication: assembly and organization of the VPg uridylylation ribonucleoprotein (initiation) complex. *J. Biol. Chem.* *282*, 16202–16213.
- Pettersen, E.F., Goddard, T.D., Huang, C.C., Couch, G.S., Greenblatt, D.M., Meng, E.C., and Ferrin, T.E. (2004). UCSF Chimera – a visualization system for exploratory research and analysis. *J. Comput. Chem.* *25*, 1605–1612.
- Phillips, J.C., Braun, R., Wang, W., Gumbart, J., Tajkhorshid, E., Villa, E., Chipot, C., Skeel, R.D., Kale, L., and Schulten, K. (2005). Scalable molecular dynamics with NAMD. *J. Comput. Chem.* *26*, 1781–1802.
- Raiborg, C., Wenzel, E.M., Pedersen, N.M., and Stenmark, H. (2016). Phosphoinositides in membrane contact sites. *Biochem. Soc. Trans.* *44*, 425–430.
- Romero-Brey, I., and Bartenschlager, R. (2014). Membranous replication factories induced by plus-strand RNA viruses. *Viruses* *6*, 2826–2857.
- Saad, J.S., Miller, J., Tai, J., Kim, A., Ghanam, R.H., and Summers, M.F. (2006). Structural basis for targeting HIV-1 Gag proteins to the plasma membrane for virus assembly. *Proc. Natl. Acad. Sci. USA* *103*, 11364–11369.
- Schneidman-Duhovny, D., Hammel, M., Tainer, J.A., and Sali, A. (2013). Accurate SAXS profile computation and its assessment by contrast variation experiments. *Biophys. J.* *105*, 962–974.
- Shaw, D.E., Dror, R.O., Salmon, J.K., Grossman, J.P., MacKenzie, K.M., Bank, J.A., Young, C., Deneroff, M.M., Batson, B., Bowers, K.J., et al. (2009). Millisecond-Scale Molecular Dynamics simulations on Anton. *Proceeding of the ACM/IEEE conference on supercomputing (SC09)*, Portland, Oregon.
- Shen, M., Reitman, Z.J., Zhao, Y., Moustafa, I., Wang, Q., Arnold, J.J., Pathak, H.B., and Cameron, C.E. (2008). Picornavirus genome replication. Identification of the surface of the poliovirus (PV) 3C dimer that interacts with PV 3Dpol during VPg uridylylation and construction of a structural model for the PV 3C2-3Dpol complex. *J. Biol. Chem.* *283*, 875–888.
- Shengjuler, D., Sun, S., Cremer, P.S., and Cameron, C.E. (2017). PIP-on-a-chip: a label-free study of protein-phosphoinositide interactions. *J. Vis. Exp.* <https://doi.org/10.3791/55869>.
- Studier, F.W. (2005). Protein production by auto-induction in high-density shaking cultures. *Protein Expr. Purif.* *41*, 207–234.
- Svergun, D.I. (1992). Determination of the regularization parameter in indirect-transform methods using perceptual criteria. *J. Appl. Crystallogr.* *25*, 495–503.
- Svergun, D.I. (1999). Restoring low resolution structure of biological macromolecules from solution scattering using simulated annealing. *Biophys. J.* *76*, 2879–2886.
- Thompson, A.A., and Peersen, O.B. (2004). Structural basis for proteolysis-dependent activation of the poliovirus RNA-dependent RNA polymerase. *EMBO J.* *23*, 3462–3471.
- van Meer, G., Voelker, D.R., and Feigenson, G.W. (2008). Membrane lipids: where they are and how they behave. *Nat. Rev. Mol. Cell Biol.* *9*, 112–124.

- Viswanathan, P., May, J., Uhm, S., Yon, C., and Korba, B. (2013). RNA binding by human Norovirus 3C-like proteases inhibits protease activity. *Virology* 438, 20–27.
- Volkov, V.V., and Svergun, D.I. (2003). Uniqueness of ab initio shape determination in small-angle scattering. *J. Appl. Crystallogr.* 36, 860–864.
- Wu, E.L., Cheng, X., Jo, S., Rui, H., Song, K.C., Davila-Contreras, E.M., Qi, Y., Lee, J., Monje-Galvan, V., Venable, R.M., et al. (2014). CHARMM-GUI Membrane Builder toward realistic biological membrane simulations. *J. Comput. Chem.* 35, 1997–2004.
- Xu, K., and Nagy, P.D. (2014). Expanding use of multi-origin subcellular membranes by positive-strand RNA viruses during replication. *Curr. Opin. Virol.* 9, 119–126.
- Yamamoto, E., Kalli, A.C., Yasuoka, K., and Sansom, M.S. (2016). Interactions of Pleckstrin homology domains with membranes: adding back the bilayer via high-throughput molecular dynamics. *Structure* 24, 1421–1431.
- Yu, J.W., Mendrola, J.M., Audhya, A., Singh, S., Keleti, D., DeWald, D.B., Murray, D., Emr, S.D., and Lemmon, M.A. (2004). Genome-wide analysis of membrane targeting by *S. cerevisiae* pleckstrin homology domains. *Mol. Cell* 13, 677–688.
- Zeitler, C.E., Estes, M.K., and Venkataram Prasad, B.V. (2006). X-Ray crystallographic structure of the Norwalk virus protease at 1.5-Å resolution. *J. Virol.* 80, 5050–5058.

## STAR★METHODS

## KEY RESOURCES TABLE

| REAGENT or RESOURCE                                                                             | SOURCE                            | IDENTIFIER    |
|-------------------------------------------------------------------------------------------------|-----------------------------------|---------------|
| <b>Bacterial and Virus Strains</b>                                                              |                                   |               |
| BL21(DE3) pCG1                                                                                  | <a href="#">Shen et al., 2008</a> | N/A           |
| Rosetta™(DE3) Competent Cells                                                                   | Millipore Sigma                   | 70954-3       |
| <b>Chemicals, Peptides, and Recombinant Proteins</b>                                            |                                   |               |
| $^{15}\text{-NH}_4\text{-Cl}$                                                                   | Cambridge Isotope Labs            | NLM-467       |
| 1-palmitoyl-2-oleoyl-sn-glycero-3-phosphocholine (POPC)                                         | Avanti Polar Lipids, Inc          | 850457C       |
| 2-Mercaptoethanol                                                                               |                                   | 60-24-2       |
| Ammonium Sulfate                                                                                | VWR                               | BDH9216-500G  |
| BODIPY® FL Phosphatidylinositol                                                                 | Echelon Biosciences               | C-00F6        |
| BODIPY® FL Phosphatidylinositol 3-phosphate                                                     | Echelon Biosciences               | C-03F6        |
| $\text{D}_2\text{O}$                                                                            | Cambridge Isotope Labs            | DLM-4-99.8-1L |
| DTT (DL-Dithiothreitol)                                                                         | VWR                               | 97061-338     |
| EDTA Disodium Salt, Dihydrate                                                                   | OmniPur                           | 4050          |
| GloPIPs BODIPY® FL-PI(3,4) $\text{P}_2$                                                         | Echelon Biosciences               | C-34F6a       |
| GloPIPs BODIPY® FL-PI(3,4,5) $\text{P}_3$                                                       | Echelon Biosciences               | C-39F6a       |
| GloPIPs BODIPY® FL-PI(3,5) $\text{P}_2$                                                         | Echelon Biosciences               | C-35F6a       |
| GloPIPs BODIPY® FL-PI(4)P                                                                       | Echelon Biosciences               | C-04F6a       |
| GloPIPs BODIPY® FL-PI(5)P                                                                       | Echelon Biosciences               | C-05F6a       |
| Glycerol                                                                                        | Fisher Biosciences                | BP229-4       |
| HEPES                                                                                           | VWR                               | 765-45-9      |
| HisPur™ Ni-NTA Resin                                                                            | ThermoFisher                      | 88222         |
| Imidazole, 99%                                                                                  | Alfa Aesar                        | 288-32-4      |
| Leupeptin                                                                                       | Sigma-Aldrich                     | L2884         |
| Lissamine Rhodamine B Sulfonyl Chloride (mixed isomers)                                         | ThermoFisher Scientific           | L-20          |
| L- $\alpha$ -phosphatidylinositol (PI)                                                          | Avanti Polar Lipids, Inc          | 840042C       |
| L- $\alpha$ -phosphatidylinositol-3-phosphate (PI3P)                                            | Avanti Polar Lipids, Inc          | LM-1900       |
| L- $\alpha$ -phosphatidylinositol-4,5-bisphosphate (PI(4,5) $\text{P}_2$ )                      | Avanti Polar Lipids, Inc          | 840046X       |
| L- $\alpha$ -phosphatidylinositol-4-phosphate (PI4P)                                            | Avanti Polar Lipids, Inc          | 840045X       |
| NZCYM Broth                                                                                     | VWR                               | J865-500G     |
| Pepstatin A Protease Inhibitor                                                                  | VWR                               | PI78436       |
| Phenylmethylsulfonyl Fluoride                                                                   | <a href="#">Amresco</a>           | M145-25G      |
| Phosphatidylinositol 4,5-bisphosphate diC <sub>4</sub> (PI(4,5) $\text{P}_2$ diC <sub>4</sub> ) | Echelon Biosciences               | P4504         |
| Phosphatidylinositol diC <sub>4</sub> (PI diC <sub>4</sub> )                                    | Echelon Biosciences               | P0004         |
| Poly(ethyleneimine) solution                                                                    | Fluka Analytical                  | P3143-500ML   |
| Q Sepharose                                                                                     | GE Healthcare                     | 17-0510-10    |
| Sodium Chloride                                                                                 | EMD                               | SX0420-3      |
| SU-8 Negative Tone Photoresist                                                                  | MicroChem Corp                    | Y131269       |
| Sylgard® 184 Silicone Elastomer Kit                                                             | Dow Corning                       | 4019862       |
| ULP-1                                                                                           | LifeSensors                       | 4010          |
| <b>Critical Commercial Assays</b>                                                               |                                   |               |
| In-Fusion HD Cloning Kit                                                                        | Clontech Laboratories, Inc        | 639650        |
| QuikChange Site Directed Mutagenesis                                                            | Stratagene                        | 210518        |
| <b>Deposited Data</b>                                                                           |                                   |               |
| CV-A16                                                                                          | GenBank                           | U05876.1      |
| CV-B3                                                                                           | GenBank                           | M88483.1      |

(Continued on next page)

**Continued**

| REAGENT or RESOURCE                                                                 | SOURCE                             | IDENTIFIER                                      |
|-------------------------------------------------------------------------------------|------------------------------------|-------------------------------------------------|
| EG-G1                                                                               | GenBank                            | AF363453.1                                      |
| EV-A71                                                                              | GenBank                            | U22521.1                                        |
| EV-D68                                                                              | GenBank                            | AY426531.1                                      |
| EV-E1                                                                               | GenBank                            | D00214.1                                        |
| EV-F1                                                                               | GenBank                            | DQ092770.1                                      |
| EV-H1                                                                               | GenBank                            | AF201894.1                                      |
| HRV-A1                                                                              | GenBank                            | FJ445111.1                                      |
| HRV-B3                                                                              | GenBank                            | DQ473485.1                                      |
| HRV-C1                                                                              | GenBank                            | EF077279.1                                      |
| Poliovirus 3C Crystal Structure                                                     | PBD                                | 1L1N                                            |
| PV-1                                                                                | GenBank                            | V01149.1                                        |
| SV6                                                                                 | GenBank                            | AF326766.2                                      |
| <b>Oligonucleotides</b>                                                             |                                    |                                                 |
| 3C-K12L-FOR (5'-CGC AGT GGC TAT GGC Tct aAG AAA CAT TGT TAC AGC-3')                 | This paper                         | N/A                                             |
| 3C-K12L-REV (5'-GCT GTA ACA ATG TTT CTt agA GCC ATA GCC ACT GCG-3')                 | This paper                         | N/A                                             |
| 3C-R13L-FOR (5'-CAG TGG CTA TGG CTA AAC taA ACA TTG TTA CAG CAA C-3')               | This paper                         | N/A                                             |
| 3C-R13L-REV (5'- GTT GCT GTA ACA ATG TTt agT TTA GCC ATA GCC ACT G-3')              | This paper                         | N/A                                             |
| 3C-R84L-FOR (5'-CTA AAG AGA AAT GAA AAG TTC ctA GAC ATT AGA CCA CAT ATA CC-3')      | This paper                         | N/A                                             |
| 3C-R84L-REV (5'-GGT ATA TGT GGT CTA ATG TCt agG AAC TTT TCA TTT CTC TTT AG-3')      | This paper                         | N/A                                             |
| PLCδ1 PH domain-FOR (5'-GAA CAG ATT GGA GGT atg gac tcg ggc cgg gac ttc-3')         | This paper                         | N/A                                             |
| PLCδ1 PH domain-REV (5'- CCG CAA GCT TGT CGA CCT Att act gga tgt tga gct cct tc-3') | This paper                         | N/A                                             |
| PV oril - (5'-AGU UCA AGA GC-3'- FL)                                                | This paper                         | N/A                                             |
| <b>Recombinant DNA</b>                                                              |                                    |                                                 |
| PLCα1 PH-mCerulean-C1 vector                                                        | This paper                         | N/A                                             |
| pSUMO-PLCα1 PH vector                                                               | This paper                         | N/A                                             |
| pET26Ub-PV-3C-C147A-C153S-Chis6                                                     | <a href="#">Amero et al., 2008</a> | N/A                                             |
| pET26Ub-PV-3C-K12L-C147A-C153S-Chis6                                                | This paper                         | N/A                                             |
| pET26Ub-PV-3C-R13L-C147A-C153S-Chis6                                                | This paper                         | N/A                                             |
| pET26Ub-PV-3C-R84L-C147A-C153S-Chis6                                                | This paper                         | N/A                                             |
| <b>Software and Algorithms</b>                                                      |                                    |                                                 |
| AutoDock 4.2 Suite                                                                  | AutoDock                           | <a href="#">Morris et al., 2009</a>             |
| Chimera                                                                             | UCSF Chimera                       | <a href="#">Pettersen et al., 2004</a>          |
| DAMAVAR                                                                             | EMBL                               | <a href="#">Volkov and Svergun, 2003</a>        |
| DAMMIF                                                                              | EMBL                               | <a href="#">Franke and Svergun, 2009</a>        |
| DAMMIN                                                                              | EMBL                               | <a href="#">Svergun, 1999</a>                   |
| FoXS                                                                                | FoXS                               | <a href="#">Schneidman-Duhovny et al., 2013</a> |
| GNOM                                                                                | EMBL                               | <a href="#">Svergun, 1992</a>                   |
| GraphPad Prism v.6                                                                  | GraphPad Software                  | N/A                                             |
| NMRPipe                                                                             | IBBR                               | <a href="#">Delaglio et al., 1995</a>           |
| NMRView                                                                             | IBBR                               | <a href="#">Johnson and Blevins, 1994</a>       |
| RAW                                                                                 | BioXTAS                            | <a href="#">Nielsen et al., 2009</a>            |
| SUPCOMB                                                                             | EMBL                               | <a href="#">Kozin and Svergun, 2001</a>         |

(Continued on next page)

**Continued**

| REAGENT or RESOURCE                                                           | SOURCE                    | IDENTIFIER |
|-------------------------------------------------------------------------------|---------------------------|------------|
| Other                                                                         |                           |            |
| 100 mm Silicon Wafer                                                          | University Wafer          | 1575       |
| Aquasonic 250D                                                                | VWR                       | N/A        |
| French Press                                                                  | Sim-Aminco                | FA-078     |
| LIPEX extruder                                                                | Transferra Nanosciences   | T.001      |
| Plasma Cleaning System                                                        | PlasmaEtch                | PE25-JW    |
| Rectangular borosilicate glass coverslips<br>(22 x 40 x 0.16-0.19 mm, No. 1½) | Fisher Scientific         | 12-544B    |
| Vivaspin-20                                                                   | Sartorius Stedium Biotech | VS2091     |
| Zeba spin desalting column                                                    | ThermoFisher              | 89882      |

**CONTACT FOR REAGENT AND RESOURCE SHARING**

Further information and requests for resources and reagents should be directed to and will be fulfilled by the Lead Contact, Craig E. Cameron ([cec9@psu.edu](mailto:cec9@psu.edu)).

**EXPERIMENTAL MODEL AND SUBJECT DETAILS****Cell Lines**

Rosetta™(DE3) Competent Cells (Millipore Sigma) were used for PLC-δ1 protein purification and grown in NZCYM media, pH 7.6, by IPTG induction.

Poliiovirus proteins were expressed and purified from *E. coli* BL21(DE3)pCG1 (Shen et al., 2008) in NZCYM media, pH 7.6, by IPTG induction.

**METHOD DETAILS****Materials**

BODIPY-FL-labeled and unlabeled water soluble phosphoinositides were from Echelon Biosciences, Inc. The lipids for supported lipid bilayer experiments, 1-palmitoyl-2-oleoyl-sn-glycero-3-phosphocholine (POPC) (850457C), L- $\alpha$ -phosphatidylinositol (PI) (840042C), L- $\alpha$ -phosphatidylinositol-3-phosphate (PI3P) (LM-1900), L- $\alpha$ -phosphatidylinositol-4-phosphate (PI4P) (840045X), and L- $\alpha$ -phosphatidylinositol-4,5-bisphosphate (PI(4,5)P<sub>2</sub>) (840046X) were from Avanti Polar Lipids. The pH sensitive fluorescent probe *ortho*-Sulforhodamine B-POPE ( $\sigma$ SRB-POPE) was synthesized following the previously published procedure (Huang et al., 2013). <sup>15</sup>N-ammonium chloride and deuterium oxide were purchased from Cambridge Isotope Laboratories. Rectangular borosilicate glass coverslips (22 x 40 x 0.16-0.19 mm, No. 1½) for supported lipid bilayer binding experiments were from Fisher Scientific (12-544B) and polydimethylsiloxane (PDMS) (Dow Corning Sylgard Silicone Elastomer-184) was from Ellsworth Adhesives (4019862). Prime grade, single side polished, silicon wafers with 100 mm diameter and 525  $\mu$ m thickness were from University Wafer (ID. 1575). All other reagents were available from VWR, Fisher Scientific, or Sigma-Aldrich.

**Construction of Expression Plasmids**

The 3C construct used in this study, pET26Ub-PV-3C-C147A-C153S-CHis6, was previously described (Amero et al., 2008). The QuikChange site-directed mutagenesis kit (Stratagene) was used to introduce mutations into the 3C coding sequence. The oligonucleotides employed were as follows: 3C-K12L-FOR (5'-CGC AGT GGC TAT GGC **Tct aAG** AAA CAT TGT TAC AGC-3'), 3C-K12L-REV (5'-GCT GTA ACA ATG TTT **CTt agA** GCC ATA GCC ACT GCG-3'), 3C-R13L-FOR (5'-CAG TGG CTA TGG CTA **AAc taA** ACA TTG TTA CAG CAA C-3'), 3C-R13L-REV (5'-GTT GCT GTA ACA ATG **TtT agT** TTA GCC ATA GCC ACT G-3'), 3C-R84L-FOR (5'-CTA AAG AGA AAT GAA AAG TTC **cta** GAC ATT AGA CCA CAT ATA CC-3'), and 3C-R84L-REV (5'-GGT ATA TGT GGT CTA ATG **TcT agG** AAC TTT TCA TTT CTC TTT AG-3'). Bold letters indicate the codon where mutations were introduced. The sequence of each clone was confirmed by Sanger sequencing at the Penn State Genomics Core Facility in University Park, PA.

PLC $\delta$ 1 PH-mCerulean-C1 vector was a kind gift of Dr. Lorraine Santy here at The Pennsylvania State University in University Park, PA. The PLC $\delta$ 1 PH domain was PCR amplified by using the forward (5'-GAA CAG ATT GGA GGT atg gac tcg ggc cgg gac ttc-3') and reverse (5'-CCG CAA GCT TGT CGA CCT Att act gga tgt tga gct cct tc-3') primers. This creates overhangs (capital letters) on either end and introduces a Bsa I cut site at the 5'-end and Sal I cut site at the 3'-end, which was used for cloning the gene into the Bsa I and Sal I-linearized pSUMO vector via homologous recombination. In-Fusion HD cloning kit (Clontech Laboratories, Inc.) was used to generate the pSUMO-PLC $\delta$ 1 PH expression plasmid.



### Molecular Docking

The docking study of PI4P to 3C and 3D proteins was carried out using AutoDock 4.2 suite of programs (Goodsell et al., 1996; Morris et al., 1998). The crystal structure of the 3C protein (PDB: 1L1N) (Mosimann et al., 1997) was obtained from the Protein Data Bank. Only chain A of the two identical monomers in the crystal structure was chosen for the docking. The protein was prepared for the docking runs as follows: the structural water molecules and any non-protein atoms were deleted from the crystal structure; explicit hydrogen atoms were added to the protein and the structure was subjected to quick minimizations (500 steps) using AMBER force field ff99SB in Chimera (Hornak et al., 2006; Pettersen et al., 2004). Next, the AutoDockTools (ADT) was used to complete the preparation of the target protein by merging the non-polar hydrogen atoms, adding Kollman charges, and creating the PDBQT files for the docking runs. The structure of the PI4P ligand was prepared by modifying the structure of PI(4,5)P<sub>2</sub>, extracted from the NMR complex structure of HIV-1 matrix protein bound to PI(4,5)P<sub>2</sub> (PDB: 2H3Z), in Chimera (Saad et al., 2006). The ligand was subjected to quick energy minimizations (100 steps) in Chimera after adding hydrogen atoms and Gasteiger-Marsili atomic partial charges; ADT was then used to prepare the ligand PDBQT file, the flexible ligand has 20 active torsions.

For the target protein, the affinity grid field was generated using the auxiliary program AutoGrid. The grid size was set to 49 x 49 x 49 points for the 3C protein with a grid spacing of 1 Å. The grid size extended at least 15 Å beyond the size of the protein in all dimensions. The docking was performed using Lamarckian Genetic Algorithm (LGA). For the target protein-ligand pair, 100 docking runs were performed with a population of 150 individuals, maximum number of 25,000,000 energy evaluations, and maximum number of 27,000 generations. The default parameters of mutation rate (0.02), crossover rate (0.80), and GA's selection window (10 generations) were used. All other parameters were kept at their default values: translation step (2.0 Å), quaternion step (50.0), and torsion step (50.0). The 100 docking solutions resulted from the run were grouped into clusters such that the ligand root-mean-square deviation (rmsd) within each cluster were below 2.0 Å. The clusters were also ranked by the value of the lowest energy solution within each cluster.

### Small Angle X-ray Scattering (SAXS) Analysis

A non-His-tagged version of 3C protein was expressed and purified. Protein samples were prepared at concentrations of 3.2, 6.5, and 13.0 mg/mL in 40 mM Tris-HCl buffer at pH 7.4 containing 200 mM NaCl, 10% glycerol, 1 mM EDTA and 2 mM DTT. Synchrotron SAXS data were collected on the F2-line station at MacCHESS at 293 K using dual Pilatus 100K-S detector and a wavelength of 1.224 Å. The data were collected using exposure times of 5 minutes in ten 30-second frames and covered a momentum transfer range (q-range) of  $0.01 < q < 0.8 \text{ \AA}^{-1}$ . The program RAW (Nielsen et al., 2009) was used for data reduction and background subtraction. The radius of gyration (Rg) and forward scattering I(0) were calculated using Guinier approximation. The GNOM program (Svergun, 1992) was used to calculate the pair-distance distribution function P(r) from which the maximum particle dimension (Dmax) and Rg were estimated. The ab initio low-resolution models were reconstructed using DAMMIN (Svergun, 1999) and DAMMIF (Franke and Svergun, 2009) programs using data in the range  $0.031 < q < 0.40 \text{ \AA}^{-1}$ ; ten independent models generated from each program were averaged using DAMAVER (Volkov and Svergun, 2003). FOXS (Schneidman-Duhovny et al., 2013) was used to calculate the theoretical scattering curves of the generated models and to carry out the fitting to the experimental data. SUPCOMB (Kozin and Svergun, 2001) was used to superimpose the 3C crystal structure (PDB: 1L1N) to the SAXS model.

### Sequence Alignments

Polyprotein sequences of *Enterovirus* prototype strains were retrieved from GenBank; CV-A16 (U05876.1), EV-A71 (U22521.1), CV-B3 (M88483.1), PV-1 (V01149.1), EV-D68 (AY426531.1), EV-E1 (D00214.1), EV-F1 (DQ092770.1), EG-G1 (AF363453.1), EV-H1 (AF201894.1), SV6 (AF326766.2), HRV-A1 (FJ445111.1), HRV-B3 (DQ473485.1), and HRV-C1 (EF077279.1). 3C sequences of each strain were aligned by Clustal Omega ([www.ebi.ac.uk/Tools/msa/clustalo/](http://www.ebi.ac.uk/Tools/msa/clustalo/)) with default alignment parameters. The pre-aligned sequences were further processed by ESPrnt 3.0 ([esprnt.ibcp.fr](http://esprnt.ibcp.fr)) program to generate PostScript files.

### Expression and Purification of PV 3C

3C protein was expressed in BL21(DE3)pCG1 competent cells as previously described (Shen et al., 2008). Cells were harvested by centrifugation at 5,400 x g at 4°C for 10 min and washed with a buffer containing 10 mM Tris and 1 mM EDTA at pH 8.0 and then re-centrifuged. The cell pellet was resuspended in Buffer A [20 mM HEPES, 10% glycerol, 5 mM imidazole, 5 mM β-mercaptoethanol (BME), 1 mM EDTA, 500 mM NaCl, 1.4 μg/mL pepstatin A, 1.0 μg/mL leupeptin, at pH 7.5] at a 5 mL Buffer A per 1-gram cell pellet ratio. The cell suspension was homogenized by Dounce homogenizer and lysed by passing through a French press twice at a pressure of 1,000 psi. Phenylmethylsulfonyl fluoride (PMSF) was added to the cell lysate at a final concentration of 1 mM. The suspension was clarified by centrifugation at 75,000 x g at 4°C for 30 min. Polyethylenimine (PEI) was added gradually to a final concentration of 0.25% (w/v) at 4°C while stirring to precipitate the contaminating nucleic acids. The PEI-containing suspension was clarified by centrifugation at 75,000 x g at 4°C for 30 min. Ammonium sulfate was gradually added to 60% saturation at 4°C while stirring to precipitate the protein and get rid of the PEI. The solution was centrifuged at 75,000 x g at 4°C for 30 min to collect the protein pellet. The pellet was resuspended in Buffer B [20 mM HEPES, 20% glycerol, 1 mM BME, 500 mM NaCl, at pH 7.5] containing 5 mM imidazole. Nickel-nitrilotriacetic (Ni-NTA) resin (Thermo Fisher Scientific Inc.) was equilibrated with 10 column volumes (c.v.) of Buffer B containing 5 mM imidazole at 1 mL/min using a peristaltic pump. The protein load was passed through the equilibrated Ni-NTA resin at 1 mL/min. To remove contaminants, the loaded resin was washed with 50 c.v. and 4 c.v. of Buffer B containing 5 mM and 50 mM imidazole, respectively. Finally, 3C was eluted into multiple fractions with Buffer B containing 500 mM imidazole. The purity

of the 3C fractions was evaluated by Coomassie-stained SDS-PAGE (12.5%) gel. Pure and concentrated fractions were pooled and dialyzed against Buffer C [20 mM HEPES, 20% glycerol, 1 mM BME, 1 mM EDTA, 250 mM NaCl, at pH 7.5] overnight at 4°C by using a 6–8,000 MWCO dialysis membrane (Spectrum Laboratories). Dialyzed 3C sample was centrifuged at 75,000 x g at 4°C for 30 min to remove any aggregates from the solution. The protein concentration was determined by measuring the absorbance at 280 nm ( $\epsilon_{max} = 0.008945 \mu\text{M}^{-1} \cdot \text{cm}^{-1}$ ) with NanoDrop 1000 (Thermo Fisher Scientific Inc.). The ionic strength of the dialyzed protein solution was confirmed with a conductivity meter. Agarose gel electrophoresis was run to check for any contaminating nucleic acids. To assess the homogeneity of the protein sample, dynamic light scattering (DLS) experiments of the purified 3C (2.0 mg/mL) were performed with Viscotek 802 DLS (Malvern Instruments Ltd.) at 20°C. Flash frozen aliquots were stored at -80°C until ready to use. The ProtParam tool (ExPASy Bioinformatics Resource Portal) was used to calculate the physical/chemical parameters of the protein.

### Expression and Purification of PLC $\delta$ 1 PH Domain

The pSUMO-PLC $\delta$ 1 PH expression plasmid was transformed into Rosetta(DE3) competent cells. The rest of the expression details are identical to that of 3C. The cell pellet was lysed and the His6-SUMO-PLC $\delta$ 1 PH domain was purified via nickel affinity chromatography as described for 3C. Note that BME concentration was increased to 2 mM for each step to avoid oxidation of the cysteine residues within the PLC $\delta$ 1 PH domain. During the overnight dialysis at 4°C, ULP1 (SUMO protease) was added at 1  $\mu\text{g}$  ULP1 per 1 mg protein to cleave off the His6-SUMO from the PLC $\delta$ 1 PH domain containing an authentic N-terminus. We observed that PLC $\delta$ 1 PH domain itself binds to the nickel resin, accordingly we were unable to use a 2<sup>nd</sup> nickel column to remove the His6-SUMO. Taking advantage of the differences in isoelectric points of PLC $\delta$ 1 PH domain (pI = 8.4) and the His6-SUMO (pI = 5.7), we used Q-Sepharose (anion exchange) resin to separate the two. After the dialysis and the cleavage were complete, the resulting solution was diluted 10-fold with Buffer D [20 mM HEPES, 20% glycerol, 2 mM BME, 1 mM EDTA, at pH 7.5] to bring down the NaCl concentration to 50 mM. Q-Sepharose resin, at a bed volume assuming 30 mg/mL binding capacity, was equilibrated with 10 c.v. of Buffer D containing 50 mM NaCl. The protein solution was passed through the equilibrated Q-Sepharose resin at 1 mL/min. The flow-through contained the PLC $\delta$ 1 PH domain. The resulting flow-through was concentrated ~30-fold with Vivaspin-20 (3,000 MWCO) centrifugal concentrators (Sartorius Stedium Biotech). The concentrated protein was re-dialyzed in Buffer D containing 250 mM NaCl. The protein concentration was determined by measuring the absorbance at 280 nm ( $\epsilon_{max} = 0.02349 \mu\text{M}^{-1} \cdot \text{cm}^{-1}$ ) with NanoDrop 1000. Homogeneity and purity of the PLC $\delta$ 1 PH domain were assessed same as in the case of 3C.

### Isotopic Labeling and Sample Preparation for NMR

<sup>15</sup>N-labeled 3C expression was performed in autoinducible minimal media as previously described (Studier, 2005). Purification was performed as described above. Purified 3C fractions were concentrated using Vivaspin-20 centrifugal concentrators (Sartorius Stedium Biotech) and buffer exchange was performed using Zeba spin desalting columns (7,000 MWCO) (Thermo Scientific). Experimental buffer conditions were 10 mM HEPES pH 8.0, 50 mM NaCl, 10% D<sub>2</sub>O. Final concentrations were about 0.2 mM, 2.0 mM and 0.2 mM for 3C protein, dibutyl-PI4P, and 11-mer RNA (5'-AGU UCA AGA GC-3'), respectively.

### NMR Spectroscopy

Resonance assignments were obtained from BioMagResBank database (BMRB ID 15222) (Amero et al., 2008). <sup>1</sup>H-<sup>15</sup>N HSQC NMR spectra were recorded at 25°C on a 600 MHz Bruker Avance III spectrometer equipped with a 5mm “inverse detection” triple resonance (<sup>1</sup>H/<sup>13</sup>C/<sup>15</sup>N) single axis gradient TCI cryoprobe. NMRPipe and NMRView software were used to process and analyze the NMR spectra (Delaglio et al., 1995; Johnson and Blevins, 1994). Chemical shift perturbations were calculated using the equation below.

$$\Delta\omega_{total} = \sqrt{(\Delta\omega_{HN})^2 + \left(\frac{\Delta\omega_N}{5}\right)^2}$$

where  $\Delta\omega_{total}$  is the overall change in chemical shift,  $\Delta\omega_{HN}$  is the change in chemical shift in the amide proton dimension and  $\Delta\omega_N$  is the change in chemical shift in the nitrogen dimension. Chemical shift perturbations at least one standard deviation above average were considered to be substantial ( $\Delta\omega_{total} = 0.019$  for 3C:PI4P-diC<sub>4</sub> binding).

### Fluorescence Polarization-Based Phosphoinositide Binding Assay

The measurements were performed as previously described (Kolli et al., 2015). To test PIP-binding specificity, 5  $\mu\text{M}$  of 3C or its mutants were added into a solution containing 0.4 nM of BODIPY-FL-labeled PIPs in a binding buffer [20 mM HEPES and 10 mM NaCl, at pH 7.5] at a 100  $\mu\text{L}$  final reaction volume. Due to tight binding, PLC $\delta$ 1 PH domain PIP-specificity was assessed at 100 mM NaCl and in the presence of 34 nM protein. For competition experiments, unlabeled dibutyl PI (Echelon-Inc. P-0004) and PI(4,5)P<sub>2</sub> (Echelon Inc. P-4504) were titrated into a solution containing a pre-formed 3C-RNA complex. 1  $\mu\text{M}$  of 3C and 0.4 nM of 3'-fluorescein (FL) labeled 11-mer RNA (5'-AGU UCA AGA GC-3'-FL), corresponding to the PV oril sequence, were added to the binding buffer. Unlabeled dibutyl-PI(4,5)P<sub>2</sub> was added last and then the milli-polarization (mP) value was recorded. Data from protein titration experiments was fit to a hyperbola. Graphs were generated by GraphPad Prism v.6 software. Error bars represent the SEM.

### Small Unilamellar Vesicle (SUV) Preparation

Lipids were mixed at the desired mole ratio in chloroform in a glass scintillation vial. The chloroform was removed by continuously purging the vial with N<sub>2</sub> gas. Desiccation was performed under vacuum for 2–3 hours to remove any residual organic solvent. The dried lipid films were hydrated with 20 mM HEPES, 100 mM NaCl, at pH 7.0 followed by sonication in a water bath at room temperature to obtain 0.5 mg/mL lipid suspensions. These suspensions were then subjected to 10 freeze–thaw cycles with liquid N<sub>2</sub> and 40°C water bath, and 10 extrusion cycles through a 100 nm track-etched polycarbonate membranes (Whatman) using a LIPEX extruder (Northern Lipids Inc.). The size and homogeneity of the SUVs were determined via Viscotek 802 DLS. To assess the quality, fluidity, and the ability of SUVs to fuse on a glass substrate, fluorescence recovery after photobleaching (FRAP) experiments were conducted. The diffusion constant for all of the vesicles prepared was within an acceptable range (>1.0 μm<sup>2</sup>/sec). In order to determine the pK<sub>a</sub> of the oSRB-POPE fluorescent probe within the SLBs in the presence or absence of phosphoinositides, pH titration experiments were conducted. This allowed us to make sure that the presence of phosphoinositides does not significantly change the dynamic range of the fluorescent probe.

### Glass Cleaning Procedure

The glass substrates used for supporting fluid lipid bilayers were first boiled in a 7-fold diluted 7X cleaning solution (MP Biomedicals) and water for one hour. This was followed by rinsing the glasses with copious amounts of purified water before drying thoroughly with nitrogen gas. The coverslips were then annealed for five hours at 550°C before being stored until use.

### Supported Lipid Bilayer (SLB) Binding Experiments

A microfluidic platform was employed to test the interaction between 3C and PIP-containing SLBs. PDMS cover block served as the ceiling of the device. The fabrication of the PDMS device was described previously (Jung et al., 2009). SLBs were formed on the glass floor of each microchannel by spontaneous fusion of the SUVs. Running Buffer [20 mM HEPES, 100 mM NaCl, at pH 7.0] was flowed through each channel for 30 min to get rid of excess vesicles. In order to equilibrate the SLBs to the experimental condition, Running Buffer containing 5 mM magnesium acetate was flowed through each channel for 30 min. The fluorescence intensity obtained post-equilibration step served as a reference for each channel. 3C dilutions were prepared using the Running Buffer containing 5 mM magnesium acetate as a diluent. SLBs containing 99.5 mol% POPC and 0.5 mol% oSRB-POPE, the pH-sensitive fluorescent lipid, served as a negative control. 3C was flowed until the fluorescence intensity in each channel stabilized (30–45 min). Change in fluorescence intensity, normalized to the reference (no 3C) channel, was plotted as a function of 3C concentration and then fit to a Langmuir isotherm using the equation below.

$$\Delta F = \frac{\Delta F_{max} \cdot [3C]}{K_{d,app} + [3C]}$$

where  $F_{max}$  represents the normalized fluorescence intensity value at saturation level and  $K_{d,app}$  represents the apparent dissociation constant. Graphs were generated by GraphPad Prism v.6 software. Error bars represent the SEM.

Images were taken with an Axiovert 200M epifluorescence microscope (Carl Zeiss Microscopy) equipped with an AxioCam MRm camera (Carl Zeiss Microscopy) and X-Cite 120 (Excelitas Technologies Corp.) light source, was used to take fluorescence images. A 10X air objective was used for imaging along with Alexa 568 filter set (Carl Zeiss Microscopy) with an excitation and emission at 576 nm and 603 nm, respectively. Exposure times (200 msec/exposure) and the number of exposures were kept to an absolute minimum to avoid photobleaching. AxioVision LE64 v.4.9.1.0 software (Carl Zeiss Microscopy) was used to process the images.

### Photomask Design

The microfluidic device was designed with a drafting software (AutoCAD v.2016). This device consists of eight channels with independent inlets and outlets. Each channel has a dimension of 1 cm x 50 μm (length x width) and each channel is separated from each other by a 25 μm gap. The design with black background and clear features was printed at a 20,000 dpi resolution on a transparent mask (5 x 7 in) by CAD/Art Services.

### Silicon Mold Fabrication

The mold containing the microfluidic patterns was fabricated in the Nanofabrication Laboratory at Penn State in University Park, PA. A 4-inch silicon wafer was dehydrated (1 min at 95°C). The SU8-50 (MicroChem Corp.), negative tone photoresist, was poured onto the center of the wafer via static dispensing method, spun (5 sec at 500 rpm, 35 sec at 3,000 rpm), pre-baked (5 min at 65°C), soft-baked (15 min at 95°C), exposed to UV light with the MA/BA6 mask aligner for 1 min (4 x 15 sec/exposure) at a power density of 8.0 mW/cm<sup>2</sup> to produce a positive relief of photoresist on the wafer, and then post-baked (1 min at 65°C and 4 min at 95°C) to selectively cross-link the UV-exposed portions of the film. The wafer was developed in an SU8 developer for 6 min (without agitation), rinsed with isopropyl alcohol (IPA), and dried with N<sub>2</sub> gas. The wafer with photoresist pattern was hard-baked for 30 sec at 65°C, 30 sec at 95°C, and 1 min at 150°C.

### Molecular Dynamics Simulations of PV 3C-membrane Interaction

In the simulations, a membrane consisting of 244 POPC and 20 PI4P lipid molecules, and a membrane composed of 244 POPC and 20 PI(4,5)P<sub>2</sub> were prepared. The model membranes were created by the CHARMM-GUI (Wu et al., 2014) and equilibrated for 50 ns.

The protein was placed above the membrane with the center of mass of the protein about 5 nm away from the center of membrane in the Z direction. The closest distance between the protein and the lipid molecules is around 0.5 nm. The starting orientation of the protein towards the membrane is based on the docking prediction, with few vital PIP-interacting residues such as R13 and R84 facing the membrane. The protein and membrane were solvated in a box of TIP3P water. Sodium and chloride ions were added at a near-physiological ion concentration of 150 mM.

The CHARMM36 force field was used for the simulation atoms (Huang and MacKerell, 2013; Klauda et al., 2010). A time step of 2 fs was employed. The van der Waals interactions was cut at 1.2 nm and the electrostatic interactions was treated with Particle-Mesh Ewald (PME) method. The SHAKE algorithm was used for length constraint on bonds involving hydrogen. The simulations were carried out under conditions of constant temperature at 310 K and constant pressure at 1 bar. The simulation system was subjected to energy minimization for 2000 steps, followed by 1 ns constraint simulation with a harmonic potential applied on protein atoms. The production simulations of 400 ns in length were then performed. The initial 30 ns of all simulations was simulated using the NAMD/2.10 package (Phillips et al., 2005). Then it was moved to the Anton supercomputer that is optimized for MD simulation for another 370 ns simulation (Shaw et al., 2009). The trajectories of the last 300 ns were used for analysis.

### QUANTIFICATION AND STATISTICAL ANALYSIS

Statistical analysis and nonlinear regression was provided by GraphPad Prism v.6. Error bars represent the SEM.

**Structure, Volume 25**

**Supplemental Information**

**The RNA-Binding Site of Poliovirus 3C Protein**

**Doubles as a Phosphoinositide-Binding Domain**

**Djoshkun Shengjuler, Yan Mei Chan, Simou Sun, Ibrahim M. Moustafa, Zhen-Lu Li, David W. Gohara, Matthias Buck, Paul S. Cremer, David D. Boehr, and Craig E. Cameron**

## Supplemental Figures

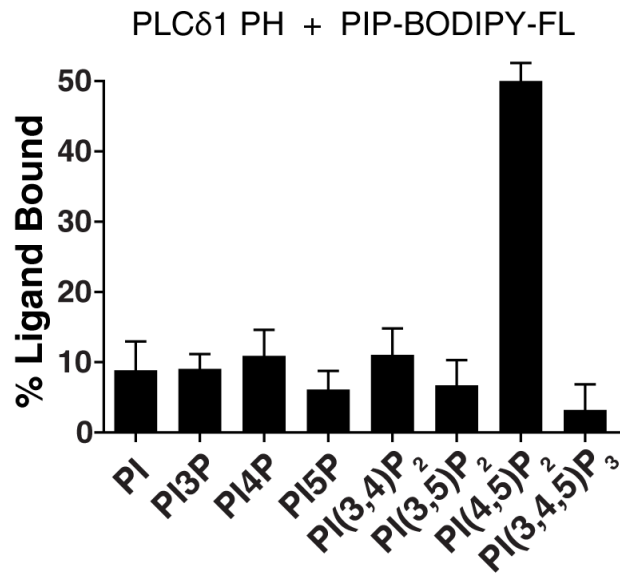

**Figure S1. Validation of the fluorescence polarization-based phosphoinositide (PIP)-binding assay. Related to Figure 3.** The well-characterized phospholipase C-delta1 pleckstrin homology (PLC- $\delta$ 1 PH) domain shows phosphatidylinositol 4,5-bisphosphate (PI(4,5)P<sub>2</sub>) specificity, as previously described (Garcia et al., 1995). The experiment was conducted at a fixed PLC $\delta$ 1 PH concentration (34 nM) using 0.4 nM of each PIP-probe in a solution containing 20 mM HEPES at pH 7.5 and 100 mM NaCl. Error bars represent the SEM (n = 3).

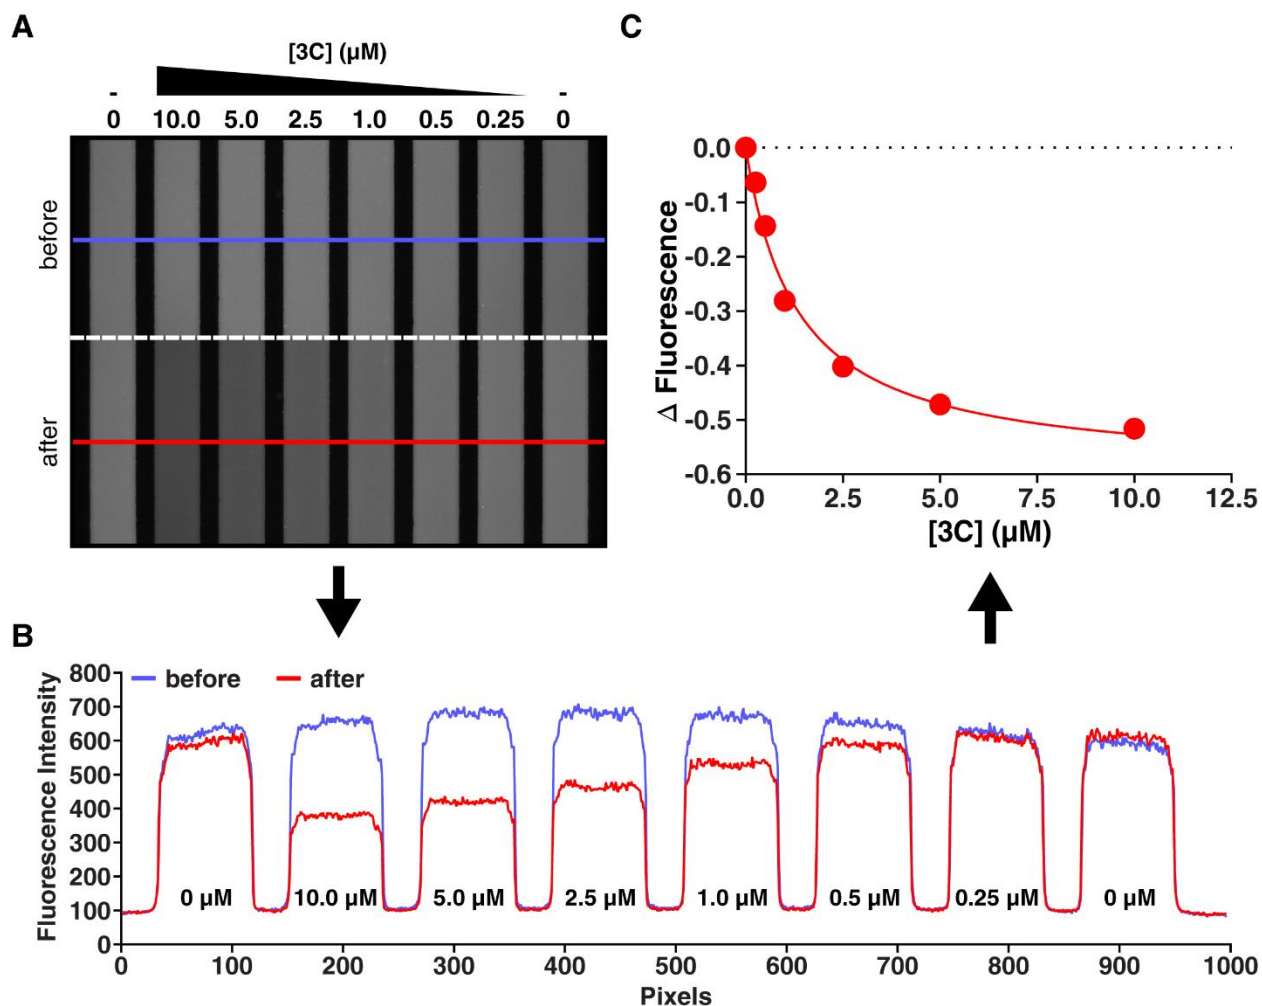

**Figure S2. Data analysis for supported lipid bilayer binding experiments. Related to Figure 4.** (A) The view of the microchannels before and after adding 3C at indicated concentrations. A 10X objective was used for imaging along with Alexa 568 filter set with an excitation and emission at 576 nm and 603 nm, respectively. Exposure time was set at 200 ms. (B) Data from the line scan across microchannels is plotted as a function of fluorescence intensity vs. pixels. Blue, before adding 3C; and red, after adding 3C. (C) Data is processed to calculate the change in fluorescence within each microchannel followed by normalization based on the reference channels using the following equation:

$$\frac{\left[ \frac{\Delta F_{protein}}{\Delta F_{blank}} \right]_{post} - \left[ \frac{\Delta F_{protein}}{\Delta F_{blank}} \right]_{pre}}{\alpha}$$

Here  $\Delta F_{protein}$  represents the background subtracted fluorescence intensity of the protein channel,  $\Delta F_{blank}$  represents the background subtracted fluorescence intensity of the reference channel, *pre* and *post* refer to before and after protein titration steps, and  $\alpha$  represents the correction factor which is the ratio of the fluorescence intensities of the protein channel and the blank channel ( $[F_{protein}/F_{blank}]_{pre}$ ) at a pre-protein titration step. Since the fluorescence intensity decreases as a function of 3C concentration, normalized data is negative in value. Shown is the hyperbolic fit, which is used to calculate an apparent dissociation constant ( $K_{d,app}$ ).

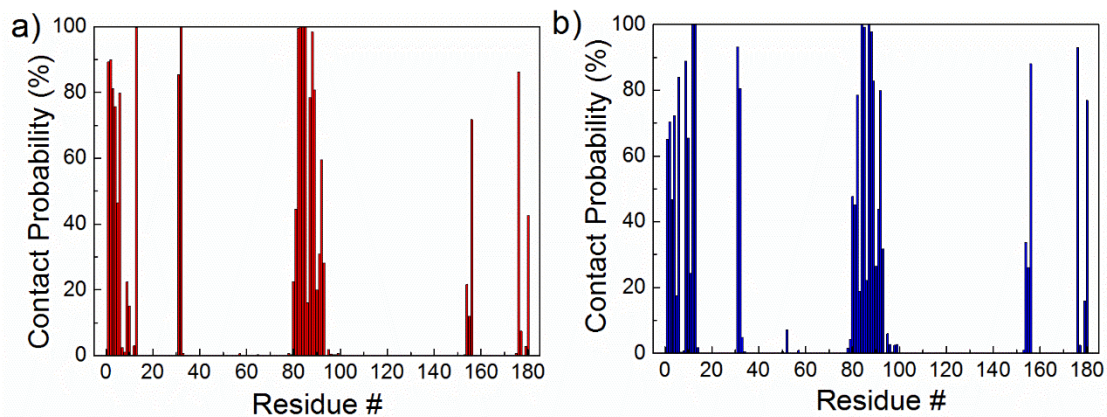

**Figure S3. Contact frequency of residues of 3C with the membrane. Related to Figure 5.** For this analysis, the last 300 ns of the trajectory was used. Residues within 5 Å of PI4P or PI(4,5)P<sub>2</sub> are counted. The 5 Å cutoff was selected because this distance captured interactions mediated by cations. Most interactions could have been captured by a cutoff less than or equal to 4 Å. a) for POPC/PI4P membrane; b) for POPC/PI(4,5)P<sub>2</sub> membrane.



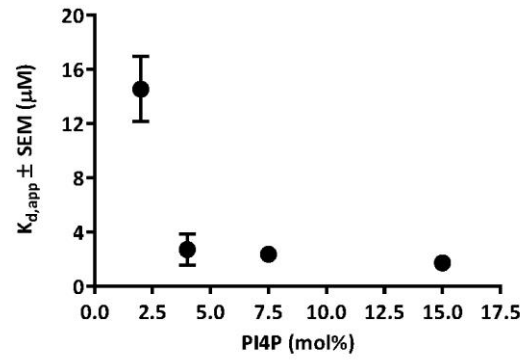

**Figure S4.** The apparent dissociation constant,  $K_{d,app}$ , is sensitive to the mole fraction of PI4P. **Related to Figure 5.** The apparent dissociation constants,  $K_{d,app}$ , determined for the 3C-PI4P interaction using the SLB binding assay at different mole fractions of PI4P (mol%).

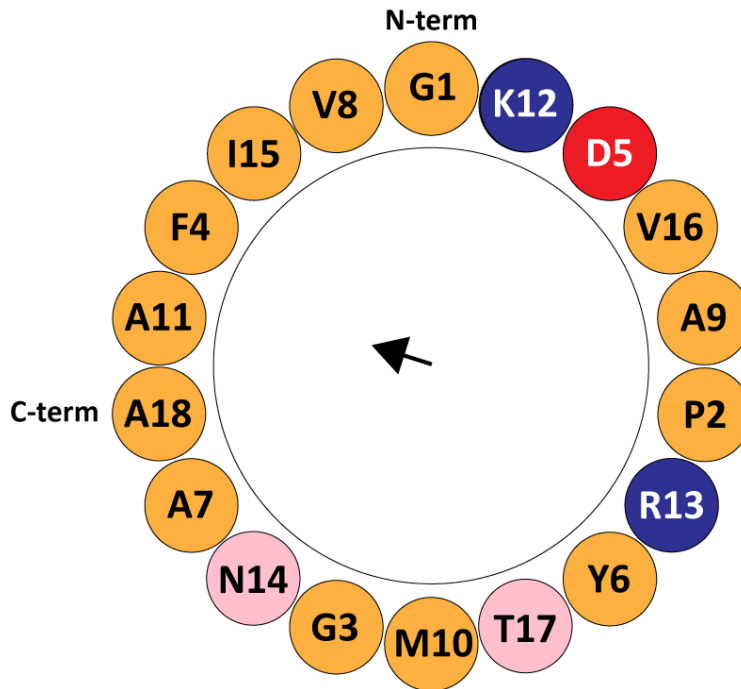

**Figure S5. The N-terminal region of 3C forms an amphipathic helix. Related to Figure 6.** The HeliQuest-Analysis web server was used to plot the N-terminal residues (1-18) of 3C into an alpha helix (<http://heliquet.ipmc.cnrs.fr/>). The arrow indicates the hydrophobic momentum. Hydrophobic residues, orange; basic residues, blue; acidic residues, red; polar uncharged residues, pink.
